# Supplementary material for: Gut microbiota phospholipids regulate intestinal gene expression and can counteract the effects of antibiotic treatment
Source: Research Square preprint supplement (doi:10.21203/rs.3.rs-7924457/v1), 2025-12-02
Supplement: Supplementary file 1 [file 08e0c1df26d61dc83cca0a22.xlsx]

## Sheet: Table S5
baseMean	log2FoldChange	lfcSE	stat	pvalue	padj	symbol	entrez	name	Ensembl gene ID	Ddirection of change in 1PAT	C1	C2	C3	C4	C5	1PAT1	1PAT2	1PAT3	1PAT4	1PAT5	LPG16.1	LPG16.2	LPG16.3	LPG16.4	LPG16.5	LPG18.1	LPG18.2	LPG18.3	LPG18.4	LPG18.5
38.4828	9.49295	2.22324	4.26987	1.96e-05	0.00130852	Retnlb	57263	resistin like beta	ENSMUSG00000022650	Up Regulated	6.47476	6.47476	6.47476	6.47476	6.64042	6.78335	6.47476	8.0991	6.47476	9.63627	6.47476	6.47476	6.47476	6.61569	6.47476	6.69184	6.8018	6.67174	6.70375	6.47476
133.726	8.7513	1.79915	4.86412	1.15e-06	0.000177779	Saa1	20208	serum amyloid A 1	ENSMUSG00000074115	Up Regulated	6.62419	6.47476	6.47476	6.47476	6.83399	7.04474	6.63587	10.2155	6.47476	10.8061	6.47476	6.47476	6.66078	6.47476	6.63545	6.64127	6.82953	6.84551	6.65111	6.67723
1244.95	6.7477	1.05761	6.38012	1.77e-10	1.53e-07	B3galt5	93961	UDP-Gal:betaGlcNAc beta 1,3-galactosyltransferase, polypeptide 5	ENSMUSG00000074892	Up Regulated	7.47342	7.33582	7.60967	7.37869	7.5721	7.17188	7.63447	13.3015	7.4298	13.804	7.5314	7.48634	7.29518	7.40254	7.44717	7.74753	7.67281	7.3618	7.76613	7.56394
91.9213	5.87846	1.26353	4.65241	3.28e-06	0.000365825	Tat	234724	tyrosine aminotransferase	ENSMUSG00000001670	Up Regulated	6.96526	6.9766	6.61248	6.77253	6.73985	7.15838	6.90671	9.80909	6.47476	10.1401	6.75888	6.47476	6.96557	7.00298	6.66864	7.06245	7.15136	6.87721	7.00066	7.04822
1207.5	5.7401	1.31038	4.38048	1.18e-05	0.000898593	Slc6a14	56774	solute carrier family 6 (neurotransmitter transporter), member 14	ENSMUSG00000031089	Up Regulated	8.24705	7.56659	7.50522	7.42334	7.52487	11.2709	8.13477	12.5145	7.56515	13.3301	6.99094	7.27026	10.5568	9.18178	7.47158	7.59759	10.4405	7.65887	6.8679	11.3042
1328.7	5.3313	0.898853	5.93123	3.01e-09	1.83e-06	Sprr2a2	100303744	small proline-rich protein 2A2	ENSMUSG00000068893	Up Regulated	7.9239	7.68806	8.5332	7.82314	8.10198	10.6173	8.7958	12.0146	8.64135	14.1306	7.57605	7.9826	9.36016	9.07353	8.33103	8.32264	9.04763	8.42396	7.35497	9.11409
1302.93	4.88708	0.852641	5.7317	9.94e-09	4.94e-06	Sprr2a3	100042514	small proline-rich protein 2A3	ENSMUSG00000074445	Up Regulated	8.42013	7.8494	8.69148	8.06136	7.97076	11.3015	9.07089	12.3474	8.89118	13.8125	7.82611	8.53404	9.86298	9.61328	8.15793	8.0647	8.96681	8.45694	7.46299	9.41403
26.4312	4.86932	0.744685	6.53877	6.2e-11	7.26e-08	Ccr4	12773	C-C motif chemokine receptor 4	ENSMUSG00000047898	Up Regulated	6.76622	6.7581	6.79056	6.77131	6.47476	7.3287	6.82153	7.96587	7.40074	8.78971	6.84096	6.80309	6.63173	6.77194	6.632	7.02516	6.7771	6.76791	6.81642	6.95645
523.187	4.84224	0.658821	7.34985	1.98e-13	3.61e-10	Cyp2c55	72082	cytochrome P450, family 2, subfamily c, polypeptide 55	ENSMUSG00000025002	Up Regulated	7.96899	7.78553	7.49578	7.37169	7.1894	12.2542	10.7548	9.38505	9.78675	9.88238	7.70924	7.85855	8.93255	9.32917	7.91183	8.32949	8.58937	8.15668	7.70577	8.72487
54.1664	4.69844	1.00655	4.66788	3.04e-06	0.000346395	Cyp3a44	337924	cytochrome P450, family 3, subfamily a, polypeptide 44	ENSMUSG00000054417	Up Regulated	6.61223	6.80142	7.06631	6.86223	6.91132	8.17974	7.62051	8.88718	6.96062	9.1101	7.0704	6.62969	7.53707	7.20788	6.77073	6.62969	6.93923	6.81219	6.63581	7.27012
401.847	4.55308	0.758952	5.99916	1.98e-09	1.35e-06	Duoxa2	66811	dual oxidase maturation factor 2	ENSMUSG00000027225	Up Regulated	7.61935	7.49705	7.96945	7.38436	7.53672	8.01491	8.10786	11.4467	8.09535	12.0246	7.8391	7.56612	7.64395	7.91668	7.56739	7.80365	7.90755	7.84538	7.76109	7.81238
75.1635	4.51561	0.877933	5.14345	2.7e-07	6.23e-05	Sprr2a1	20755	small proline-rich protein 2A1	ENSMUSG00000078664	Up Regulated	7.10019	6.87444	7.1508	6.82888	6.80535	8.01047	7.17842	8.86688	7.24351	9.87841	7.06993	7.27031	7.49835	7.47348	6.91796	6.98689	7.16852	6.47476	6.9814	7.27
659.304	4.03727	0.870221	4.63936	3.49e-06	0.000379371	Fut2	14344	fucosyltransferase 2	ENSMUSG00000055978	Up Regulated	7.84584	8.24086	8.25888	7.87547	8.56227	7.91631	7.98193	12.0374	7.80052	12.8549	7.87745	7.86494	7.86993	7.62811	7.83148	7.74837	8.27282	8.11233	7.80824	7.84508
341.507	3.62497	0.801754	4.5213	6.15e-06	0.000578978	Car4	12351	carbonic anhydrase 4	ENSMUSG00000000805	Up Regulated	7.57727	7.40037	7.88018	7.4426	8.34225	8.02775	7.71483	10.6904	7.86182	11.6917	7.61387	7.70968	8.06154	8.46451	7.83213	8.24251	8.65506	8.43768	8.6887	8.38271
518.065	3.61157	1.27488	2.83288	0.00461313	0.0497997	Car3	12350	carbonic anhydrase 3	ENSMUSG00000027559	Up Regulated	7.26948	7.03517	9.52453	7.05548	6.9731	10.1874	12.3791	9.72569	8.00689	9.98357	8.27056	6.9118	10.5535	7.43117	7.6286	7.30238	7.40466	6.92451	7.06958	8.71526
172.547	3.46739	0.934861	3.70899	0.00020809	0.00670098	Lrg1	76905	leucine-rich alpha-2-glycoprotein 1	ENSMUSG00000037095	Up Regulated	7.53349	7.15006	7.73348	7.73229	7.4367	7.14552	7.87148	9.35502	7.25464	11.2099	7.75805	7.82786	7.26153	7.08136	7.16323	7.32403	7.20365	7.53924	7.46248	6.79639
31.8875	3.33447	0.654501	5.09467	3.49e-07	7.15e-05	Prss27	213171	serine protease 27	ENSMUSG00000050762	Up Regulated	6.78161	6.8275	7.16719	6.82827	7.02081	7.12762	7.06343	8.37005	7.09046	8.70943	6.92362	6.98597	7.0052	6.89406	7.02572	6.96141	6.99258	6.98978	6.92921	6.89964
7.71581	3.30257	1.05664	3.12553	0.00177483	0.0275225	Vwa3b	70853	von Willebrand factor A domain containing 3B	ENSMUSG00000050122	Up Regulated	6.58507	6.61693	6.62427	6.91615	6.47476	7.30744	6.47476	6.92367	6.70217	7.0969	6.70484	6.66987	6.89173	6.62354	6.76445	6.96467	7.27574	6.81413	6.47476	7.24685
2176.08	3.23099	0.692424	4.66621	3.07e-06	0.00034682	Duox2	214593	dual oxidase 2	ENSMUSG00000068452	Up Regulated	9.43321	9.5779	10.5812	8.97889	9.32978	10.2373	10.3205	13.5709	10.0538	13.979	9.96295	8.96748	9.96885	10.5525	10.2213	10.225	10.6752	10.0616	9.45075	10.1359
9.30596	3.19621	1.05066	3.04208	0.00234948	0.0327191	Dmgdh	74129	dimethylglycine dehydrogenase precursor	ENSMUSG00000042102	Up Regulated	6.73966	6.6036	6.79511	6.62778	6.75101	6.84123	6.47476	7.45846	6.60529	7.66149	6.47476	6.62421	6.94772	6.60966	6.87795	7.10477	6.95021	6.93353	6.74333	6.74339
7.58608	3.16114	0.807986	3.91237	9.14e-05	0.00393186	Krt17	16667	keratin 17	ENSMUSG00000035557	Up Regulated	6.61222	6.66363	6.62368	6.63326	6.47476	6.74341	6.98541	7.00374	6.83204	6.94109	6.89775	6.78412	6.80474	6.99627	6.91762	6.93727	7.18585	6.91015	6.86845	7.20531
48190.4	3.14904	0.658543	4.78183	1.74e-06	0.000235313	Reg3g	19695	regenerating islet-derived 3 gamma	ENSMUSG00000030017	Up Regulated	12.9828	13.3399	14.5007	13.2556	14.9552	14.8328	14.5203	18.1151	14.0132	18.5275	12.9017	12.8987	14.0611	14.0981	13.4686	13.827	14.6427	14.3895	13.0711	14.4079
12.153	3.06985	0.871963	3.52063	0.00043053	0.0112885	Bhmt2	64918	betaine-homocysteine methyltransferase 2	ENSMUSG00000042118	Up Regulated	6.66911	6.8014	6.9878	6.63339	6.47476	6.78517	6.89238	7.69148	6.87961	7.74177	6.774	6.47476	6.96268	6.67255	6.77079	6.8208	6.99379	6.90941	6.79622	7.09381
508.357	3.06955	0.65693	4.67256	2.97e-06	0.000342664	St6galnac6	50935	ST6 (alpha-N-acetyl-neuraminyl-2,3-beta-galactosyl-1,3)-N-acetylgalactosaminide alpha-2,6-sialyltransferase 6	ENSMUSG00000026811	Up Regulated	8.32978	8.3355	8.65941	7.88397	7.88799	9.52275	8.72709	11.2019	8.60468	11.723	8.20973	7.80847	9.13847	8.90027	8.31401	8.74721	9.56075	8.79822	8.09065	9.53259
13.6043	3.0128	0.87423	3.44623	0.000568466	0.013311	Tmprss11f	243083	transmembrane protease, serine 11f	ENSMUSG00000048764	Up Regulated	6.47476	6.6615	6.83432	6.74628	6.99852	7.19169	6.76726	7.32198	6.87879	7.98466	6.81071	6.62799	7.07884	6.97733	6.94034	6.69167	6.87343	6.66739	6.83568	7.16527
9.51023	2.96669	0.712648	4.16291	3.14e-05	0.00190358	Gzmb	14939	granzyme B	ENSMUSG00000015437	Up Regulated	6.66907	6.60837	6.77224	6.86197	6.76117	6.96347	6.86563	7.21871	6.85657	7.75685	6.73445	6.69371	6.68376	6.7876	6.77061	6.82	6.93871	6.91033	6.98209	6.75344
12.5527	2.94212	0.995258	2.95613	0.00311523	0.0390539	A530016L24Rik	319942	RIKEN cDNA A530016L24 gene	ENSMUSG00000043122	Up Regulated	6.47476	6.59681	7.15236	6.67966	6.62601	7.25954	8.00793	6.91282	6.81297	7.24421	6.66824	6.66652	7.14589	6.87459	6.65815	6.61645	6.76286	6.72649	6.68265	6.98589
9.35635	2.9167	1.00236	2.90983	0.00361628	0.0429798	Tshr	22095	thyroid stimulating hormone receptor	ENSMUSG00000020963	Up Regulated	6.85312	6.47476	6.90202	6.69998	6.47476	7.03854	7.7714	6.98657	6.69174	7.18047	6.90469	6.47476	7.0345	6.69948	6.81015	6.60391	6.47476	6.6368	6.98339	6.77373
68.7562	2.89084	0.600652	4.81283	1.49e-06	0.000210264	Thrsp	21835	thyroid hormone responsive	ENSMUSG00000035686	Up Regulated	7.14318	7.20008	7.35637	7.39616	7.12718	8.00806	9.57327	7.81634	7.36965	8.29146	7.29768	7.07137	7.71762	7.18056	7.17916	7.20939	7.08699	6.95248	7.13499	7.32669
10.3422	2.87333	0.909962	3.15764	0.00159055	0.0257107	Tgm5	74176	transglutaminase 5	ENSMUSG00000053675	Up Regulated	6.71167	6.95232	6.7707	6.47476	6.47476	6.88308	7.04244	7.14645	6.77565	7.77396	6.47476	6.62904	6.91456	6.78575	6.69958	7.02832	7.10612	6.94842	6.63503	7.00365
21.3526	2.74773	0.675894	4.06532	4.8e-05	0.00260291	Duoxa1	213696	dual oxidase maturation factor 1	ENSMUSG00000027224	Up Regulated	6.8463	6.9706	7.02803	6.75763	6.85553	6.79792	7.19141	7.98396	7.02327	8.04844	7.06491	6.67027	6.89008	7.00515	7.1255	6.91632	7.1042	7.0828	7.13409	6.93674
23.6018	2.74696	0.737799	3.72319	0.000196724	0.00643613	Or10j2	258645	olfactory receptor family 10 subfamily J member 2	ENSMUSG00000049605	Up Regulated	6.85949	6.91268	7.19054	6.69729	6.96526	7.00646	7.0763	8.38335	7.08562	7.99885	6.80618	6.83611	6.76739	7.04304	6.8342	6.78229	6.6385	7.2153	7.14602	6.89584
75.548	2.66715	0.791262	3.37076	0.000749618	0.0155532	Pla2g5	18784	phospholipase A2, group V	ENSMUSG00000041193	Up Regulated	7.47677	7.10995	7.54173	7.41246	7.08579	7.30405	7.1565	9.01326	7.46812	9.62035	7.69362	7.37575	7.02156	7.08201	6.95779	7.16267	7.19066	7.35903	6.97383	7.4776
107.766	2.56819	0.707054	3.63225	0.000280962	0.00840375	Mal	17153	myelin and lymphocyte protein, T cell differentiation protein	ENSMUSG00000027375	Up Regulated	7.57585	7.50035	7.52174	7.55614	7.266	7.76166	7.59811	9.5355	7.27755	9.63804	7.3129	7.43697	7.76128	7.71738	7.35182	7.53421	7.86027	7.86198	6.92269	7.74472
14.0307	2.4653	0.63464	3.88456	0.000102515	0.00422192	Duox1	99439	dual oxidase 1	ENSMUSG00000033268	Up Regulated	6.71274	6.8014	7.0838	6.79176	6.76119	6.88519	7.11531	7.57161	7.0455	7.77937	6.92217	6.69384	6.91632	6.93658	6.89286	6.93884	7.04335	6.94991	6.70213	6.89926
24.8002	2.38928	0.662287	3.60762	0.000309021	0.00901275	Tmeff2	56363	transmembrane protein with EGF-like and two follistatin-like domains 2	ENSMUSG00000026109	Up Regulated	6.85921	6.83106	7.19363	6.89763	6.81691	7.99814	7.87907	7.03577	7.26899	6.94624	6.85965	7.11172	7.06893	7.24715	7.29578	6.9804	7.62791	6.90918	6.9243	7.07193
1709.66	2.38461	0.779145	3.06055	0.00220933	0.031513	Nos2	18126	nitric oxide synthase 2, inducible	ENSMUSG00000020826	Up Regulated	10.2566	10.2194	10.4342	9.16547	8.53869	9.56557	10.2523	13.5667	9.86614	12.6067	9.73905	9.32743	9.46977	9.74127	10.2247	10.4419	10.1821	11.8553	8.96598	9.057
40108.1	2.23028	0.564901	3.94809	7.88e-05	0.0035571	Dmbt1	12945	deleted in malignant brain tumors 1	ENSMUSG00000047517	Up Regulated	13.8681	14.0463	14.9127	13.6481	14.9488	14.2623	14.3731	17.469	14.4073	17.9636	14.1224	13.6937	14.1161	14.6543	14.3323	14.2401	14.6041	14.0632	14.6545	14.0091
79.0486	2.21201	0.640747	3.45223	0.000555978	0.0132457	Lcn2	16819	lipocalin 2	ENSMUSG00000026822	Up Regulated	7.39625	7.5478	7.44941	7.30377	7.56361	7.25778	7.54312	8.72298	7.41837	9.6094	7.46077	7.56906	7.44215	7.33141	7.1649	7.29668	7.22179	7.42234	7.62459	7.26885
69191.4	2.1732	0.603058	3.60364	0.000313792	0.00911944	Reg3b	18489	regenerating islet-derived 3 beta	ENSMUSG00000071356	Up Regulated	14.2317	14.6537	15.648	14.4289	16.1605	15.8444	15.5202	18.3585	14.9498	18.5648	13.8151	14.2811	15.3492	15.0611	14.5147	14.6496	15.6804	15.5933	14.1935	15.7293
8.93848	2.14662	0.553982	3.87489	0.000106674	0.00434948	Gm12610	102633081	predicted gene 12610	ENSMUSG00000086035	Up Regulated	6.74028	6.81575	6.83069	6.69315	6.6505	7.11663	7.21728	6.8592	6.91397	7.15817	6.86528	6.71385	7.07345	6.8611	6.94541	6.98158	6.96567	6.85997	6.96247	6.85893
2079.82	2.1147	0.508133	4.16171	3.16e-05	0.00190358	Stom	13830	stomatin	ENSMUSG00000026880	Up Regulated	10.0387	10.1552	10.2442	10.0972	10.5529	10.7267	10.5875	13.3427	10.079	13.046	10.2019	10.2033	10.9124	10.6095	10.1276	10.603	11.0602	10.7577	10.7134	10.83
11.0959	2.10463	0.609604	3.45245	0.000555517	0.0132457	Spata33	320869	spermatogenesis associated 33	ENSMUSG00000048478	Up Regulated	6.83163	6.74604	6.73017	6.76527	6.88573	7.16501	6.84666	7.40422	6.82626	7.35434	6.87494	7.22407	6.85953	6.99072	6.85867	7.10448	6.8341	6.83633	6.88298	6.78559
69.7303	2.09594	0.528768	3.96382	7.38e-05	0.00339036	C2cd4b	75697	C2 calcium-dependent domain containing 4B	ENSMUSG00000091956	Up Regulated	7.50859	7.4559	7.63542	7.22644	7.29192	7.48379	7.61192	8.41581	7.27668	9.5068	7.29966	7.24051	7.31273	7.34821	7.314	7.29661	7.44447	7.37751	7.17108	7.31558
7.59096	2.09101	0.725128	2.88364	0.00393106	0.0452168	6430710C18Rik	76218	RIKEN cDNA 6430710C18 gene	ENSMUSG00000085427	Up Regulated	6.65356	6.63161	6.76112	6.8033	6.71838	6.82665	6.78746	7.07612	6.84599	7.18745	6.77687	6.70266	6.9648	7.0667	6.86871	6.81006	6.75531	6.70402	7.18993	7.05018
571.889	2.07288	0.536703	3.86224	0.000112351	0.00447851	B3gnt7	227327	UDP-GlcNAc:betaGal beta-1,3-N-acetylglucosaminyltransferase 7	ENSMUSG00000079445	Up Regulated	8.98903	9.01978	8.99536	8.59697	8.96739	8.82795	8.98592	11.5606	8.89774	11.6377	8.88679	8.87881	8.86118	8.7422	8.92286	8.87369	8.88771	8.99277	8.73411	8.69651
571.405	2.04176	0.48008	4.25296	2.11e-05	0.00139431	Fam3d	18300	FAM3 metabolism regulating signaling molecule D	ENSMUSG00000021749	Up Regulated	8.71043	8.58865	8.87791	8.3341	8.18409	10.0658	9.5134	10.4467	9.31553	10.6176	8.76585	8.33595	9.90575	10.2958	9.15656	9.3311	10.1687	9.43238	8.543	9.97566
1315.78	2.01626	0.647084	3.11592	0.00183371	0.0280638	Ada	11486	adenosine deaminase	ENSMUSG00000017697	Up Regulated	9.12876	8.38295	9.18539	9.74933	10.9493	10.4732	10.3702	12.1211	10.6713	12.5862	9.7027	9.02081	9.98708	10.2568	9.04278	9.64439	9.48802	9.71549	11.617	9.60776
10.4703	1.99086	0.565852	3.51834	0.000434254	0.0113161	Lrrc37a	237954	leucine rich repeat containing 37A	ENSMUSG00000078632	Up Regulated	6.81095	6.70598	6.98748	6.7495	6.84415	6.98847	7.04487	7.55013	6.99635	7.16303	6.47476	6.85353	6.83571	6.78674	6.89293	6.93912	6.87829	6.90862	6.92797	7.07291
437.636	1.89415	0.603571	3.13824	0.00169968	0.0268137	Socs3	12702	suppressor of cytokine signaling 3	ENSMUSG00000053113	Up Regulated	8.74623	8.65647	8.72397	8.80919	8.9682	8.25934	8.85367	10.9323	8.31045	11.5508	8.46161	8.69296	8.32564	8.2451	8.56252	8.56739	8.35426	8.76342	8.88689	8.21295
62.2713	1.82069	0.443251	4.10758	4e-05	0.0022755	Fyb2	242594	FYN binding protein 2	ENSMUSG00000078612	Up Regulated	7.51729	7.2666	7.51513	6.89331	7.06779	7.73575	7.89139	8.31852	7.53399	8.19687	7.38328	7.2409	7.49824	7.73901	7.68827	7.67208	7.55669	8.10843	7.25407	7.5859
30.6263	1.80936	0.36235	4.9934	5.93e-07	0.000105695	Pimreg	109212	PICALM interacting mitotic regulator	ENSMUSG00000020808	Up Regulated	6.87925	7.02845	7.24591	7.02663	6.86157	7.59119	7.49839	7.55587	7.46629	7.36387	7.19526	7.20912	7.40721	7.36512	7.43858	7.5632	7.43032	7.12028	7.12343	7.19015
38.3915	1.79462	0.464684	3.86203	0.000112451	0.00447851	Car5b	56078	carbonic anhydrase 5b, mitochondrial	ENSMUSG00000031373	Up Regulated	7.02063	7.12529	7.3643	7.21164	7.04868	7.4951	8.43813	7.6271	7.23059	7.40523	7.35184	7.29695	7.66675	7.21967	7.37819	7.33966	7.01816	7.05468	7.20338	7.31347
10.6628	1.78839	0.616815	2.8994	0.00373876	0.0436792	Clvs1	74438	clavesin 1	ENSMUSG00000041216	Up Regulated	6.71653	6.78186	6.87918	6.75659	6.6803	7.08876	6.82633	6.85281	7.29521	7.08199	6.81692	6.7017	6.93653	7.04393	6.81641	6.83243	7.29459	7.1151	6.89534	7.23458
1880.36	1.76246	0.444904	3.96143	7.45e-05	0.00339777	Scd1	20249	stearoyl-Coenzyme A desaturase 1	ENSMUSG00000037071	Up Regulated	10.5624	9.90463	10.9301	10.0851	9.2776	11.7194	12.8601	11.3431	10.771	11.8264	10.2743	9.96813	11.472	10.7648	10.7101	10.5465	11.0014	10.7559	9.50391	10.6872
11.2776	1.75973	0.574877	3.06105	0.00220562	0.031513	Stac	20840	src homology three (SH3) and cysteine rich domain	ENSMUSG00000032502	Up Regulated	6.8031	6.68923	6.75591	7.02585	6.87984	7.32048	7.06951	6.95027	7.21137	6.98863	6.7524	7.0327	6.96669	6.93754	6.85	6.79558	7.29651	6.93949	6.90396	6.95523
788.456	1.74432	0.453983	3.84225	0.000121911	0.00466977	Chst4	26887	carbohydrate sulfotransferase 4	ENSMUSG00000035930	Up Regulated	9.44023	9.3443	9.38509	9.47139	9.23109	9.47078	9.54163	11.6096	9.44058	11.9421	9.21469	9.18011	9.49668	9.44984	9.45189	9.25485	9.55498	9.35563	9.08565	9.4841
268.762	1.74189	0.338981	5.13859	2.77e-07	6.3e-05	Batf2	74481	basic leucine zipper transcription factor, ATF-like 2	ENSMUSG00000039699	Up Regulated	8.05165	8.20243	8.73171	7.87094	7.7551	9.05599	9.02211	9.58338	8.57005	9.87036	8.4231	7.81454	8.69373	8.71614	8.4155	8.67901	8.87834	8.84252	8.43067	8.98552
61.0402	1.70853	0.450856	3.78953	0.000150935	0.00535492	Serpinb5	20724	serine (or cysteine) peptidase inhibitor, clade B, member 5	ENSMUSG00000067006	Up Regulated	7.1552	7.24266	7.61038	7.15314	7.34976	7.83449	7.57918	8.37765	7.29277	8.29856	7.16775	7.2583	7.66141	7.86112	7.77399	7.52311	7.81346	7.59328	7.34978	7.581
599.524	1.70365	0.38253	4.45365	8.44e-06	0.000706673	Ptk6	20459	PTK6 protein tyrosine kinase 6	ENSMUSG00000038751	Up Regulated	8.8863	8.82486	9.31707	8.87039	9.27333	9.59797	9.79056	11.2902	9.16846	11.0335	8.77431	8.97497	9.38804	9.37762	9.0643	8.96574	9.09485	9.61947	9.11217	9.24289
130.44	1.67533	0.559225	2.99581	0.00273714	0.0361519	Il18bp	16068	interleukin 18 binding protein	ENSMUSG00000070427	Up Regulated	7.73644	7.68066	7.87094	7.95696	7.95396	7.48181	7.9483	9.47233	7.81974	9.60557	7.79515	8.03891	7.90064	7.50198	7.53052	7.63839	7.6249	8.00965	8.04206	7.61882
4121.59	1.65846	0.430297	3.85423	0.000116094	0.00457428	Gpx2	14776	glutathione peroxidase 2	ENSMUSG00000042808	Up Regulated	11.302	11.3227	11.9834	11.2138	11.5994	11.3951	11.736	13.9772	11.8659	14.1584	11.5625	11.074	11.3558	11.4341	11.5649	11.5385	11.3502	11.6566	11.1725	11.2021
25.5311	1.65065	0.549691	3.00286	0.00267454	0.0355693	Sptssb	66183	serine palmitoyltransferase, small subunit B	ENSMUSG00000043461	Up Regulated	7.06268	6.94806	7.03898	7.23247	7.17201	6.93773	7.12999	7.99917	7.23505	7.94696	7.0698	6.80117	7.26177	7.16276	7.12877	7.22199	6.92838	7.03449	7.08868	7.03338
3429.03	1.63898	0.355127	4.61519	3.93e-06	0.000410802	Cd38	12494	CD38 antigen	ENSMUSG00000029084	Up Regulated	10.9706	11.0717	11.4676	11.1929	11.0316	11.6901	11.766	13.6567	11.5832	13.4227	11.3108	11.0512	11.5366	11.679	11.4184	11.2857	11.3542	11.4509	11.0955	11.6237
190.703	1.62979	0.496764	3.28081	0.00103509	0.0192579	Mfsd2a	76574	MFSD2 lysolipid transporter A, lysophospholipid	ENSMUSG00000028655	Up Regulated	7.82564	7.68314	8.20211	7.75795	8.46552	8.05038	8.47979	9.52999	8.22268	9.78347	8.19607	7.6334	8.14882	8.39361	8.28211	8.21209	8.00867	8.15184	8.89319	8.04152
160.731	1.59584	0.305841	5.21788	1.81e-07	4.49e-05	Trim40	195359	tripartite motif-containing 40	ENSMUSG00000073399	Up Regulated	7.92435	8.05475	8.13793	7.7747	7.74343	8.31382	8.31834	9.41602	8.28469	9.37939	7.96194	7.86761	7.91161	7.91175	8.0167	8.29767	8.10228	8.33128	7.90578	8.2987
43.8442	1.57262	0.515792	3.04894	0.0022965	0.0322604	Abcd2	26874	ATP-binding cassette, sub-family D member 2	ENSMUSG00000055782	Up Regulated	7.18697	7.2872	7.38681	7.18317	7.22848	7.83228	8.56172	7.26276	7.31609	7.40251	7.40011	7.31233	8.07152	7.34346	7.17835	6.97783	7.21108	7.07746	7.05636	7.31839
381.024	1.54728	0.327808	4.72008	2.36e-06	0.000290547	St6galnac4	20448	ST6 (alpha-N-acetyl-neuraminyl-2,3-beta-galactosyl-1,3)-N-acetylgalactosaminide alpha-2,6-sialyltransferase 4	ENSMUSG00000079442	Up Regulated	8.61569	8.88108	8.65795	8.46939	8.54107	9.20979	9.02601	10.1384	8.84294	10.6927	8.70973	8.49614	8.64368	8.84906	8.69384	8.72423	9.20511	8.81707	8.42737	9.28913
598.54	1.5457	0.471732	3.27665	0.00105047	0.0194997	Upp1	22271	uridine phosphorylase 1	ENSMUSG00000020407	Up Regulated	8.26061	8.15602	9.425	9.0071	9.61421	9.52403	9.56485	11.0064	9.24581	10.8758	9.20921	8.38787	9.66192	9.37323	9.01475	9.4693	9.39746	9.41937	9.78171	9.62268
3853.98	1.49585	0.422739	3.53847	0.000402446	0.0108317	Slc40a1	53945	solute carrier family 40 (iron-regulated transporter), member 1	ENSMUSG00000025993	Up Regulated	11.6887	11.7225	11.8759	10.9107	10.8119	12.1659	12.1359	13.6958	11.6514	13.6414	10.7864	11.2913	12.055	11.6861	11.6653	11.1812	11.4958	11.5592	9.80544	11.9169
1175.66	1.49293	0.412492	3.61929	0.000295409	0.00873484	Ifit1bl1	667373	interferon induced protein with tetratricpeptide repeats 1B like 1	ENSMUSG00000079339	Up Regulated	9.41024	9.34131	10.4729	9.68977	10.355	10.378	10.4051	12.0275	10.2846	12.0125	9.8966	9.56198	10.7358	10.4727	10.0589	9.4452	9.65598	9.75972	9.46324	9.66415
29.5589	1.47271	0.326558	4.5098	6.49e-06	0.000607775	Nlrp10	244202	NLR family, pyrin domain containing 10	ENSMUSG00000049709	Up Regulated	7.10017	7.1371	7.10123	7.10495	7.13163	7.65691	7.314	7.70117	7.2768	7.61149	7.13862	7.27032	7.46807	7.36686	7.23662	7.09137	7.20562	7.33362	6.92815	7.16993
10.8575	1.46368	0.509631	2.87204	0.00407833	0.0464544	Stag3	50878	STAG3 cohesin complex component	ENSMUSG00000036928	Up Regulated	6.86164	6.89106	6.59674	6.83789	6.8577	7.00274	7.21675	6.98074	6.98743	7.07353	6.81255	6.9639	6.91877	7.14595	7.05991	7.04136	7.11678	6.82719	7.09423	6.80522
405.239	1.43829	0.405045	3.55093	0.000383875	0.010452	Trim15	69097	tripartite motif-containing 15	ENSMUSG00000050747	Up Regulated	8.85307	8.69121	8.91836	8.60853	8.64806	8.94443	8.90889	10.4048	8.83839	10.743	8.25832	8.71571	8.91187	8.53615	8.55646	8.89819	9.48842	8.91528	9.02246	9.0393
11.7815	1.40385	0.458764	3.06007	0.00221289	0.031513	Npas4	225872	neuronal PAS domain protein 4	ENSMUSG00000045903	Up Regulated	6.90462	6.90458	6.89713	6.77005	6.47476	7.1175	7.01843	6.81924	7.05363	7.24635	6.92908	6.99937	7.08621	7.07294	7.04321	7.14518	6.9745	6.9422	7.04584	6.99194
16216.6	1.40272	0.34383	4.07969	4.51e-05	0.00248042	Ceacam2	26367	CEA cell adhesion molecule 2	ENSMUSG00000054385	Up Regulated	13.2495	13.2585	13.6362	13.1868	13.4951	14.4269	13.9899	15.5688	13.4523	15.3213	13.0111	13.1718	14.22	14.0719	13.4595	13.4925	14.0761	13.7632	13.2845	14.1322
50.492	1.38683	0.467264	2.96797	0.00299772	0.0380896	1810065E05Rik	69864	RIKEN cDNA 1810065E05 gene	ENSMUSG00000013653	Up Regulated	7.33141	7.28792	7.34416	7.1404	7.08976	8.1227	7.73483	7.38041	7.61697	7.49024	7.28838	7.08959	8.03325	7.6355	7.52883	7.47718	7.62845	7.31794	7.15397	8.0134
1986.28	1.379	0.365086	3.77719	0.000158605	0.00554306	Reg3a	19694	regenerating islet-derived 3 alpha	ENSMUSG00000079516	Up Regulated	10.1426	10.0868	10.1306	10.6432	11.0812	11.1359	10.8775	12.3433	10.9178	12.5149	10.6343	10.8158	10.7035	10.8966	10.4815	10.7107	10.9053	10.5337	11.6782	11.1202
90.2549	1.35875	0.47985	2.83161	0.00463141	0.0498447	Gna14	14675	guanine nucleotide binding protein, alpha 14	ENSMUSG00000024697	Up Regulated	7.88273	7.85725	7.66645	7.56681	7.33621	7.64238	7.49847	9.03841	7.41313	8.97525	7.4241	7.71132	7.60739	7.64554	7.66007	7.65678	7.76609	7.70189	7.39713	7.84276
964.104	1.35682	0.424032	3.1998	0.00137525	0.0231767	Hk2	15277	hexokinase 2	ENSMUSG00000000628	Up Regulated	9.6263	9.72566	10.0303	9.75914	9.81538	9.6314	9.77098	11.7378	9.58151	12.0507	9.59632	9.437	9.52885	9.61681	9.73377	9.6199	9.98701	9.67442	9.66143	9.73284
261.907	1.35238	0.329147	4.10874	3.98e-05	0.00227202	Slc28a3	114304	solute carrier family 28 (sodium-coupled nucleoside transporter), member 3	ENSMUSG00000021553	Up Regulated	7.81551	8.14153	8.65998	8.29347	8.5145	8.33982	8.66669	9.6554	8.94884	9.81602	8.61486	8.28685	8.40977	8.73411	8.46666	8.51541	8.6645	8.52784	9.09924	8.41197
929.881	1.3392	0.412641	3.24544	0.0011727	0.0209159	Dhrs9	241452	dehydrogenase/reductase 9	ENSMUSG00000027068	Up Regulated	9.96257	9.65742	10.2539	9.04491	9.45613	10.1817	10.6402	11.7159	10.1854	11.1225	9.31959	9.90788	10.3504	10.1091	9.93691	9.02631	9.23334	10.1795	8.49022	9.1363
10.5702	1.33704	0.451579	2.96082	0.00306823	0.038656	Mtnr1a	17773	melatonin receptor 1A	ENSMUSG00000054764	Up Regulated	6.98084	6.70339	6.83461	6.74594	6.87459	7.08452	7.05682	7.02082	7.13817	6.95816	7.00672	7.05173	6.7667	6.9904	7.10446	6.93212	6.98731	6.86007	7.00048	7.0002
59.1013	1.32053	0.375993	3.51212	0.000444551	0.0114931	Capn3	12335	calpain 3	ENSMUSG00000079110	Up Regulated	7.50357	7.19721	7.46532	7.21202	7.25137	7.83772	7.93684	7.80865	7.94516	7.43615	7.51636	7.57017	7.67595	7.81685	7.5561	7.72404	7.61124	7.53585	7.01171	8.04271
11153.1	1.32014	0.259235	5.09245	3.53e-07	7.15e-05	Actg2	11468	actin, gamma 2, smooth muscle, enteric	ENSMUSG00000059430	Up Regulated	12.7813	12.5907	13.3454	11.7393	11.9827	13.9978	13.9314	13.686	13.9318	13.9208	13.6477	12.5954	13.8304	13.6648	13.5052	13.8833	13.9496	13.2677	12.8821	13.6295
6643.94	1.31684	0.335382	3.92639	8.62e-05	0.00380965	Ceacam1	26365	CEA cell adhesion molecule 1	ENSMUSG00000074272	Up Regulated	12.0599	12.0895	12.4399	11.9745	12.2283	13.1784	12.6777	14.1854	12.1879	14.0436	11.7204	11.9909	12.9568	12.7946	12.2283	12.2418	12.9074	12.5144	12.1027	12.8381
602.358	1.30884	0.402043	3.25548	0.001132	0.0204156	Lpl	16956	lipoprotein lipase	ENSMUSG00000015568	Up Regulated	8.99855	9.1622	9.5072	8.91408	9.2631	9.93001	11.3671	9.74316	9.0084	10.0123	9.47157	9.26744	10.2233	9.02909	9.21653	9.2354	9.02509	8.79819	9.09655	9.39856
22.5874	1.30587	0.4011	3.25571	0.00113107	0.0204156	Tnf	21926	tumor necrosis factor	ENSMUSG00000024401	Up Regulated	7.12014	6.89038	7.09936	7.23276	6.9056	7.10191	7.21232	7.67598	7.2556	7.57086	7.31663	7.19913	7.07218	7.08847	7.12337	7.08208	7.09733	7.23848	7.06581	6.9992
27.8071	1.30017	0.402208	3.23258	0.00122678	0.0215601	Pla2g3	237625	phospholipase A2, group III	ENSMUSG00000034579	Up Regulated	7.25896	7.04113	6.99294	6.9613	6.80726	7.38807	7.32849	7.46299	7.28004	7.28876	7.19263	6.91715	7.47606	7.35258	7.41216	7.34469	7.26855	7.36906	7.17676	7.56169
14.7327	1.28933	0.434113	2.97003	0.0029777	0.0379234	Omp	18378	olfactory marker protein	ENSMUSG00000074006	Up Regulated	6.90802	6.9544	6.94359	6.79149	6.84412	7.14633	6.98538	7.09141	6.99629	7.36169	6.96961	6.96262	7.16167	7.03135	7.0063	6.98633	7.10856	7.35554	6.95584	7.20512
21.2729	1.25737	0.443991	2.83198	0.00462614	0.0498207	1810008I18Rik	100503969	RIKEN cDNA 1810008I18 gene	ENSMUSG00000100094	Up Regulated	7.10185	7.1356	7.07911	6.99178	7.04319	6.93322	7.29453	7.69042	7.20614	7.61506	7.06618	7.03343	7.24038	7.2165	6.975	7.23309	6.88781	6.92063	7.08018	7.05453
1942.51	1.25669	0.270104	4.65261	3.28e-06	0.000365825	Prss30	30943	serine protease 30	ENSMUSG00000024124	Up Regulated	10.6456	10.3081	10.6864	10.0721	10.5457	11.6275	11.2548	12.1262	10.7322	11.9585	10.1108	10.3007	11.4052	11.1019	10.5516	10.957	11.2874	11.0613	10.4556	11.3806
32.9617	1.25027	0.423466	2.95247	0.0031524	0.0392936	Chrm4	12672	cholinergic receptor, muscarinic 4	ENSMUSG00000040495	Up Regulated	7.29984	7.15006	7.26716	7.02074	6.9113	7.42713	7.37362	7.83967	7.22022	7.54821	7.01293	7.17792	7.11424	7.54488	7.20777	7.46979	7.64199	7.33633	7.11453	7.43701
21.6122	1.23899	0.420433	2.94693	0.00320946	0.0398231	Upk1a	109637	uroplakin 1A	ENSMUSG00000006313	Up Regulated	7.05421	7.00635	7.02888	6.99773	6.9113	7.43879	7.26292	7.34012	7.3189	6.96363	6.94742	7.07069	7.26152	7.31552	7.14769	7.25433	7.30329	7.1988	6.86855	7.42439
22.4069	1.22695	0.331266	3.70382	0.000212381	0.00678585	Nnmt	18113	nicotinamide N-methyltransferase	ENSMUSG00000032271	Up Regulated	6.99722	7.14904	7.19423	6.88854	7.16019	7.34727	7.60317	7.31625	7.32273	7.36779	7.15469	7.02856	7.296	7.18651	7.09884	7.00712	7.22568	6.87958	7.03126	7.12069
18.8994	1.22159	0.382633	3.1926	0.00140996	0.0235823	Aldh3b2	621603	aldehyde dehydrogenase 3 family, member B2	ENSMUSG00000075296	Up Regulated	7.06998	6.9544	7.15095	7.17744	6.91132	7.07258	7.67918	7.35432	7.20841	7.37323	7.15552	7.16149	7.07987	6.9158	7.0637	6.96276	6.93934	6.9885	6.92856	6.9285
386.249	1.21908	0.275686	4.42197	9.78e-06	0.000780733	Fam162a	70186	family with sequence similarity 162, member A	ENSMUSG00000003955	Up Regulated	8.93196	8.77692	8.62887	8.53173	8.56774	9.18572	8.94331	9.62803	8.92283	10.5103	8.97583	8.92656	9.17278	9.1389	8.89066	8.82476	8.99695	8.87482	8.84271	9.19778
68.4451	1.21198	0.397926	3.04573	0.00232114	0.0324527	B3gnt6	272411	UDP-GlcNAc:betaGal beta-1,3-N-acetylglucosaminyltransferase 6	ENSMUSG00000074004	Up Regulated	7.58923	7.57404	7.59939	7.37192	7.11109	8.01632	7.91764	8.02019	7.38767	8.26587	7.27183	7.31203	7.81298	7.86798	7.40782	7.58682	7.90102	7.45106	7.59658	8.05996
101.474	1.18855	0.393527	3.02026	0.00252554	0.0344645	Acta1	11459	actin alpha 1, skeletal muscle	ENSMUSG00000031972	Up Regulated	7.83991	7.63063	7.97453	7.55571	7.31226	8.41517	8.02146	8.35463	7.94012	8.42966	7.74968	7.41318	8.25214	8.0596	7.99235	7.56086	8.47878	7.50214	7.55208	7.85296
689.303	1.18721	0.364861	3.25388	0.00113842	0.0204156	Celsr1	12614	cadherin, EGF LAG seven-pass G-type receptor 1	ENSMUSG00000016028	Up Regulated	9.34956	9.60656	9.5066	9.29303	9.02887	9.47715	9.65618	10.9235	9.63834	11.1308	9.36368	9.30057	9.45284	9.87773	9.57203	9.51351	10.0142	9.29887	8.80262	9.62061
39.3032	1.18076	0.377485	3.12797	0.0017602	0.0274195	C1qtnf3	81799	C1q and tumor necrosis factor related protein 3	ENSMUSG00000058914	Up Regulated	7.19319	7.08824	7.30596	7.02448	7.17968	7.45858	7.41575	7.66641	7.61632	7.30982	7.42964	7.37716	7.59426	7.84475	7.03746	7.37348	7.59756	7.40035	7.24057	7.60909
1046.52	1.17916	0.385898	3.05563	0.0022459	0.0317503	Mptx2	100504232	mucosal pentraxin 2	ENSMUSG00000079180	Up Regulated	9.89652	9.87481	10.1025	9.87163	10.0876	9.87432	9.96535	12.1088	10.0572	11.49	9.63159	9.89676	9.70923	9.68925	9.49112	9.75252	9.73376	10.0231	10.1363	9.97832
62.1963	1.17865	0.268784	4.38513	1.16e-05	0.000883702	Hsd11b1	15483	hydroxysteroid 11-beta dehydrogenase 1	ENSMUSG00000016194	Up Regulated	7.39853	7.23879	7.54034	7.44824	7.33617	7.60973	7.69709	7.86179	7.79346	8.14239	7.68608	7.46529	7.74829	7.89783	7.51425	7.60289	7.45856	7.74129	7.52076	7.79919
2569.36	1.17513	0.320274	3.66914	0.00024337	0.00752656	Tm4sf20	66261	transmembrane 4 L six family member 20	ENSMUSG00000026149	Up Regulated	10.8052	10.8271	11.1355	11.0102	11.4167	11.3819	11.2204	13.0789	11.2951	12.7194	10.8477	10.9885	10.9585	11.0446	10.9082	10.9354	11.3497	10.9999	11.2214	11.2036
66.3089	1.16644	0.397856	2.93182	0.00336978	0.0412194	Ces1d	104158	carboxylesterase 1D	ENSMUSG00000056973	Up Regulated	7.68048	7.22155	7.3108	7.14956	7.46553	7.75949	8.0889	7.35523	7.72086	7.94378	7.52895	7.35174	7.85691	7.83487	7.71556	7.31566	7.82976	7.89032	7.60006	8.21639
2256.63	1.16252	0.236396	4.91768	8.76e-07	0.000144994	Endod1	71946	endonuclease domain containing 1	ENSMUSG00000037419	Up Regulated	10.7858	10.5956	10.6816	10.4766	10.7266	12.0057	11.351	11.9863	11.1345	11.9615	10.7954	10.7342	11.639	11.6122	11.0057	10.9624	11.5233	10.9435	10.5135	11.6873
992.45	1.15986	0.295661	3.92295	8.75e-05	0.00383359	Cd14	12475	CD14 antigen	ENSMUSG00000051439	Up Regulated	10.0088	9.77533	10.0142	9.51788	9.38228	10.538	10.2913	11.193	9.98887	11.3375	9.40665	9.61199	10.4663	10.1932	9.95463	9.70669	10.1529	10.4322	9.18998	10.2815
1074.72	1.15865	0.254459	4.55341	5.28e-06	0.000524356	Trp53i11	277414	transformation related protein 53 inducible protein 11	ENSMUSG00000068735	Up Regulated	9.93492	10.0118	10.0866	9.74225	9.65195	10.3155	10.1502	11.3446	10.2742	11.7108	10.0943	9.72018	10.1524	10.2229	10.1525	10.1768	10.1892	9.89173	9.71164	10.0032
28.3755	1.15562	0.333528	3.46483	0.000530566	0.0128869	Hspb2	69253	heat shock protein 2	ENSMUSG00000038086	Up Regulated	7.23301	6.98456	7.26869	7.09043	6.99656	7.45552	7.60368	7.23973	7.39365	7.4518	7.3965	7.17028	7.28045	7.22867	7.23941	7.2284	7.3479	7.30926	6.91617	7.36697
28.5	1.14765	0.372292	3.08267	0.00205152	0.0300237	Epop	103551	elongin BC and polycomb repressive complex 2 associated protein	ENSMUSG00000043439	Up Regulated	7.16929	7.09676	7.26662	7.24311	6.94121	7.40439	7.1932	7.64319	7.1715	7.80114	7.21612	7.07089	7.3244	7.20761	7.20818	7.32589	7.36433	7.14476	7.13318	7.18783
3026.01	1.14579	0.228081	5.02361	5.07e-07	9.24e-05	Cnn1	12797	calponin 1	ENSMUSG00000001349	Up Regulated	11.1656	10.8448	11.362	10.4126	10.4896	11.9882	11.9671	11.9777	12.0478	11.8943	11.8626	10.8729	12.0184	11.9944	11.59	12.1094	11.7977	11.4513	11.1078	12.1083
73.6398	1.14513	0.34913	3.27996	0.00103823	0.0192943	Thpo	21832	thrombopoietin	ENSMUSG00000022847	Up Regulated	7.51661	7.59374	7.63017	7.42927	7.79534	7.76907	7.56226	8.62156	7.62304	8.49672	7.36706	7.58193	7.53776	7.49976	7.60418	7.5892	7.65197	7.6641	7.47879	7.83882
41.9767	1.14297	0.328117	3.48343	0.000495033	0.0123314	G0s2	14373	G0/G1 switch gene 2	ENSMUSG00000009633	Up Regulated	7.34167	7.13727	7.37976	7.36934	7.36754	7.62344	8.18247	7.62178	7.34894	7.60237	7.476	7.32463	7.60248	7.27213	7.31311	7.32037	7.36003	7.29662	7.20759	7.15279
199.584	1.14155	0.294695	3.87366	0.000107211	0.00434974	Nlrx1	270151	NLR family member X1	ENSMUSG00000032109	Up Regulated	8.15523	8.0147	8.14965	8.04893	8.37003	8.72326	8.24078	9.11641	8.43501	9.35058	8.24598	7.77328	8.53997	8.62708	8.55802	8.49588	8.69734	8.29761	8.23772	8.2813
51.2838	1.13866	0.366803	3.10428	0.00190746	0.0287892	Marchf3	320253	membrane associated ring-CH-type finger 3	ENSMUSG00000032656	Up Regulated	7.48122	7.19587	7.31563	7.67809	7.34735	7.8796	7.52328	7.85434	7.49584	8.28083	7.16405	7.26292	7.63736	7.36368	7.30535	7.3498	7.57523	7.37074	7.28727	7.70172
55.4077	1.12706	0.299522	3.76286	0.000167984	0.00579668	Mcpt1	17224	mast cell protease 1	ENSMUSG00000022227	Up Regulated	7.3621	7.30845	7.24068	7.28685	7.48808	7.805	7.72706	7.85515	7.6595	7.60244	7.53539	7.35105	7.40629	7.90784	7.38432	7.76765	7.86321	7.81241	7.42635	7.42487
3210.2	1.12604	0.277059	4.06427	4.82e-05	0.00260291	Rnasel	24014	ribonuclease L (2', 5'-oligoisoadenylate synthetase-dependent)	ENSMUSG00000066800	Up Regulated	11.2085	11.1603	11.2402	10.9859	10.9546	12.2848	11.7266	12.5833	11.3304	12.5717	10.8704	10.9788	11.9527	11.8037	11.3769	11.5077	12.3486	11.629	11.0638	12.531
5351.63	1.12363	0.267778	4.19612	2.72e-05	0.0016858	Gsr	14782	glutathione reductase	ENSMUSG00000031584	Up Regulated	11.9313	12.1269	12.1355	11.969	12.1209	12.3235	12.1141	13.7634	12.2942	14.0515	12.1783	12.1019	12.0859	12.2707	12.1808	12.0162	11.9832	11.9608	12.0555	12.0882
264.321	1.12262	0.243265	4.6148	3.93e-06	0.000410802	Optc	269120	opticin	ENSMUSG00000010311	Up Regulated	8.51239	8.23313	8.57194	7.92889	7.90736	9.05061	8.86917	8.89823	9.03373	8.97685	8.59731	8.37519	8.85138	9.12356	8.80942	8.86864	9.03262	8.47361	8.47511	9.02891
26.2025	1.12243	0.355617	3.15627	0.00159798	0.0258055	Adat3	100113398	adenosine deaminase, tRNA-specific 3	ENSMUSG00000113640	Up Regulated	7.18489	6.97565	7.17051	7.21072	6.9545	7.42491	7.29117	7.42787	7.2392	7.60586	7.14923	7.0362	6.95449	7.33675	7.25956	7.22419	7.18524	7.40085	7.10187	7.41809
494.537	1.11883	0.23183	4.82606	1.39e-06	0.000203806	Zc3h12a	230738	zinc finger CCCH type containing 12A	ENSMUSG00000042677	Up Regulated	9.25613	9.20652	8.93499	8.74161	8.63869	9.49102	9.53111	10.341	9.46241	10.1011	9.09836	8.98986	9.03369	9.11671	9.3908	9.09857	9.5348	9.74837	8.94212	9.36697
27.3624	1.1161	0.376158	2.9671	0.00300622	0.0381385	Adrb3	11556	adrenergic receptor, beta 3	ENSMUSG00000031489	Up Regulated	7.25442	6.92786	7.41261	6.93966	7.08782	7.4461	7.67554	7.26732	7.3247	7.53332	6.99404	7.05229	7.32826	7.17816	7.20277	7.28457	7.12128	7.23238	7.32094	7.22234
27.7122	1.11343	0.371568	2.99656	0.00273044	0.0360925	Mcpt2	17225	mast cell protease 2	ENSMUSG00000022226	Up Regulated	7.09981	7.15011	6.89504	7.14082	7.22523	7.49366	7.09864	7.69046	7.32902	7.28847	7.32616	7.29777	7.2751	7.39051	7.02551	7.39813	7.20251	7.3381	7.2236	7.09437
100.434	1.1006	0.280304	3.92644	8.62e-05	0.00380965	Gsdmcl2	665769	gasdermin C-like 2	ENSMUSG00000121311	Up Regulated	7.44535	7.68894	7.94019	7.79815	7.99628	8.28887	7.9342	8.50304	8.10522	8.69783	7.94328	7.69457	7.60661	7.7505	7.66028	7.7112	7.78548	7.48458	8.03631	7.88205
63.7942	1.10054	0.334898	3.28618	0.00101556	0.019024	Socs1	12703	suppressor of cytokine signaling 1	ENSMUSG00000038037	Up Regulated	7.44959	7.30746	7.65843	7.67742	7.60509	7.72051	7.64588	8.08737	7.61911	8.6306	7.44571	7.60246	7.35861	7.25612	7.39839	7.57925	7.53499	7.5547	7.62912	7.52181
1165.01	1.09104	0.227061	4.80504	1.55e-06	0.000215586	Bcl3	12051	B cell leukemia/lymphoma 3	ENSMUSG00000053175	Up Regulated	10.1034	9.85428	10.3795	9.99766	10.1531	10.602	10.5688	11.5746	10.3302	11.7303	10.1512	10.1471	9.85301	9.96476	9.86745	10.0071	10.1567	10.2173	9.80786	9.98
30.9465	1.08062	0.2759	3.9167	8.98e-05	0.00389267	Nxpe5	381680	neurexophilin and PC-esterase domain family, member 5	ENSMUSG00000047592	Up Regulated	7.12384	7.17347	7.25431	7.1394	6.97811	7.5194	7.47681	7.40838	7.38651	7.38257	7.2473	7.12272	7.27989	7.49536	7.19727	7.43601	7.40784	7.17179	7.35361	7.43526
87.4789	1.07224	0.308585	3.47469	0.000511436	0.0126338	Noxa1	241275	NADPH oxidase activator 1	ENSMUSG00000036805	Up Regulated	7.78336	7.75822	7.58125	7.38537	7.20722	8.13363	7.86015	7.92698	7.83637	8.32349	7.68603	7.53957	8.06453	7.94556	8.00053	7.98145	8.05453	7.81672	7.55258	7.98136
57.4058	1.06584	0.365294	2.91777	0.0035254	0.0424889	Sh3bgr	50795	SH3-binding domain glutamic acid-rich protein	ENSMUSG00000040666	Up Regulated	7.41323	7.36663	7.4435	7.15318	7.36516	8.19804	7.80159	7.63492	7.43064	7.39972	7.66694	7.19443	7.62224	7.72564	7.50079	7.59641	7.86666	7.7893	7.34257	7.88943
759.921	1.05983	0.197214	5.37398	7.7e-08	2.58e-05	Hspb6	243912	heat shock protein, alpha-crystallin-related, B6	ENSMUSG00000036854	Up Regulated	9.49186	9.38269	9.60866	8.85293	9.12814	10.2214	10.0812	10.1433	10.2126	10.2241	10.0479	9.28392	10.1122	10.104	9.91473	10.1424	9.98844	9.68433	9.45915	10.0549
106.912	1.05513	0.288533	3.65688	0.0002553	0.00780712	F13a1	74145	coagulation factor XIII, A1 subunit	ENSMUSG00000039109	Up Regulated	7.58421	7.52227	8.05871	7.74946	7.86727	8.44828	8.74627	7.88625	8.06076	8.09416	8.1755	7.64945	8.10254	7.76723	7.88329	7.91481	7.83622	7.75227	7.97436	7.92125
240.126	1.05367	0.199325	5.2862	1.25e-07	3.65e-05	Nfil3	18030	nuclear factor, interleukin 3, regulated	ENSMUSG00000056749	Up Regulated	8.24682	8.36369	8.52631	8.37799	8.50133	8.67757	8.99836	9.38024	8.89036	9.38894	8.67365	8.5734	8.6685	8.76033	8.53398	7.95869	8.00906	8.55095	8.28672	8.28085
63.764	1.04072	0.329822	3.15539	0.00160281	0.0258325	Tnfsf13	69583	tumor necrosis factor (ligand) superfamily, member 13	ENSMUSG00000089669	Up Regulated	7.45289	7.42689	7.61172	7.43465	7.17384	7.87997	7.5702	7.80328	7.83839	7.99051	7.5534	7.09681	7.65174	7.92399	7.74563	7.70225	7.86064	7.67566	7.44575	7.84676
241.827	1.02787	0.213942	4.80442	1.55e-06	0.000215586	Fanca	14087	Fanconi anemia, complementation group A	ENSMUSG00000032815	Up Regulated	8.20954	8.37808	8.43813	8.19408	8.30797	8.50617	9.13553	8.97796	8.84199	9.21989	8.58173	8.51522	9.11088	8.64661	8.47407	8.72039	8.54471	8.75558	8.36111	8.19869
786.112	1.01904	0.193096	5.27739	1.31e-07	3.7e-05	Me1	17436	malic enzyme 1, NADP(+)-dependent, cytosolic	ENSMUSG00000032418	Up Regulated	9.28484	9.43047	9.38415	9.51901	9.75831	10.0457	10.6655	10.2892	9.94555	10.5525	9.66086	9.86352	9.99318	10.128	9.97811	9.50771	9.80331	9.13724	10.0503	9.9173
1388.92	1.01645	0.254352	3.99623	6.44e-05	0.00314904	Fam3b	52793	FAM3 metabolism regulating signaling molecule B	ENSMUSG00000022938	Up Regulated	10.1619	10.0165	10.3405	10.1578	10.5	10.6195	10.5194	11.7673	10.3301	11.8129	10.0165	10.1593	10.5597	10.4921	10.1126	10.2475	10.3758	10.7126	10.7668	10.5901
81.9134	1.01372	0.313606	3.23247	0.00122723	0.0215601	Tmem200a	77220	transmembrane protein 200A	ENSMUSG00000049420	Up Regulated	7.58507	7.62539	7.50051	7.52415	7.57053	7.89985	7.51778	8.43705	8.1231	7.81125	7.9398	7.65209	7.61422	8.19162	7.9707	7.53997	7.81808	7.76969	7.47333	7.98439
429.301	1.00858	0.254218	3.96738	7.27e-05	0.00336461	Gsdmc3	270328	gasdermin C3	ENSMUSG00000055827	Up Regulated	8.66679	8.75903	9.16988	9.10921	9.14683	9.53688	9.05704	9.95046	9.55205	10.3346	9.1475	8.56798	8.93786	8.74388	8.94586	8.97763	9.19283	8.47279	9.12949	9.33368
73.0844	1.00731	0.295802	3.40535	0.000660798	0.0144246	Rnf225	381845	ring finger protein 225	ENSMUSG00000033967	Up Regulated	7.59698	7.6854	7.56271	7.72505	7.51281	7.91455	7.77228	8.42691	7.57277	8.3803	7.43912	7.62481	7.47833	7.68271	7.72009	7.67222	7.78111	7.6445	7.47302	7.42384
4257.8	-1.00291	0.231088	-4.33994	1.43e-05	0.0010201	Ndrg1	17988	N-myc downstream regulated gene 1	ENSMUSG00000005125	Down Regulated	12.1124	12.2847	11.9051	12.8532	13.1277	11.7049	11.7561	11.2651	11.8332	11.1656	12.068	12.4693	11.8767	11.7853	11.7554	11.94	12.0139	11.918	12.805	11.989
1908.04	-1.0074	0.338992	-2.97174	0.00296113	0.0377686	Creb3l2	208647	cAMP responsive element binding protein 3-like 2	ENSMUSG00000038648	Down Regulated	10.9165	11.0959	11.1277	11.7011	12.0981	10.3379	10.5806	10.5005	10.8097	10.4069	11.1013	11.2598	10.6304	10.4678	10.8593	10.8118	10.4582	10.6012	12.1402	10.4007
4047.48	-1.00796	0.230799	-4.36726	1.26e-05	0.000932258	Slc3a2	17254	solute carrier family 3 (activators of dibasic and neutral amino acid transport), member 2	ENSMUSG00000010095	Down Regulated	12.0863	12.1982	12.2052	12.6519	13.098	11.6242	11.7131	11.4546	11.6834	11.1247	11.8995	12.3555	11.745	11.5732	11.7708	11.9632	11.625	11.9757	12.8312	11.6201
7394.12	-1.01719	0.344482	-2.95282	0.0031489	0.0392798	Epb41l3	13823	erythrocyte membrane protein band 4.1 like 3	ENSMUSG00000024044	Down Regulated	12.6959	12.9172	12.7866	13.5333	14.2808	12.3029	12.2749	12.6507	12.2275	12.4231	12.7765	13.2365	12.4189	12.3889	12.3282	12.5573	12.4333	12.6094	13.9391	12.3798
786.505	-1.01889	0.142511	-7.14952	8.71e-13	1.43e-09	Gas2l3	237436	growth arrest-specific 2 like 3	ENSMUSG00000074802	Down Regulated	10.1927	10.0962	10.1873	10.4636	10.4707	9.46889	9.43739	9.53126	9.49547	9.30922	9.68783	9.65758	9.52937	9.5432	9.90994	9.99854	9.7411	10.3922	10.2254	9.73454
58.2207	-1.02164	0.325506	-3.13863	0.00169741	0.0268037	Fndc5	384061	fibronectin type III domain containing 5	ENSMUSG00000001334	Down Regulated	7.81506	7.91963	7.73239	7.81855	7.67899	7.69228	7.48079	7.14936	7.49347	7.1315	7.58819	8.06304	7.54613	7.49144	7.52101	7.35257	7.4848	7.61522	7.71446	7.41108
21.9699	-1.03512	0.356202	-2.90599	0.00366091	0.0434173	Gpr119	236781	G-protein coupled receptor 119	ENSMUSG00000051209	Down Regulated	7.42042	7.15002	7.18176	7.38493	7.42338	6.9392	7.13172	7.07082	7.02958	7.14742	7.10576	7.17814	7.22023	7.1543	7.26335	7.21052	6.76007	7.22225	7.07319	7.27004
34.8044	-1.03524	0.308728	-3.35325	0.000798687	0.0162021	Spmip3	69428	sperm microtubule inner protein 3	ENSMUSG00000015962	Down Regulated	7.4381	7.59609	7.33278	7.51284	7.51256	7.23903	7.14783	7.23421	7.2316	7.063	7.34097	7.61372	7.24946	7.30765	7.11431	7.23485	7.44042	7.29804	7.65251	7.35925
2066.35	-1.03928	0.210371	-4.94024	7.8e-07	0.000133225	Flvcr1	226844	feline leukemia virus subgroup C cellular receptor 1	ENSMUSG00000066595	Down Regulated	11.3364	11.4666	11.3843	11.7212	11.8405	10.6561	10.9796	10.5074	10.8443	9.7649	10.9943	11.4795	10.97	10.6783	11.1453	11.0724	10.7527	11.1405	11.5487	10.9219
12770.5	-1.03945	0.341318	-3.0454	0.00232372	0.0324527	Slc43a2	215113	solute carrier family 43, member 2	ENSMUSG00000038178	Down Regulated	13.5358	13.6664	13.6683	14.3561	14.918	13.067	13.0434	13.3917	12.8482	13.1372	13.4045	13.8115	13.3845	13.0474	13.0714	13.3768	13.4262	13.4736	14.7634	13.4454
372.726	-1.04739	0.178389	-5.87135	4.32e-09	2.36e-06	Pappa	18491	pregnancy-associated plasma protein A	ENSMUSG00000028370	Down Regulated	9.46014	9.65873	8.92204	9.45429	9.32273	8.80122	8.82669	8.58963	8.59309	8.38477	9.005	9.12218	8.95363	9.128	9.33815	9.32797	8.82859	9.06122	8.89288	8.89432
975.682	-1.04879	0.277953	-3.77325	0.000161132	0.00558376	1810055G02Rik	72056	RIKEN cDNA 1810055G02 gene	ENSMUSG00000035372	Down Regulated	10.2294	10.2505	10.2503	10.6035	11.1372	9.81025	9.70157	9.51961	9.74343	9.44985	9.98303	10.423	9.8119	9.74706	9.82033	9.83289	9.961	10.0113	11.3271	9.80446
2596.59	-1.05225	0.220316	-4.77611	1.79e-06	0.000237502	Clec2e	232409	C-type lectin domain family 2, member e	ENSMUSG00000030155	Down Regulated	11.5924	11.7274	11.6697	12.0855	12.2574	10.9715	11.154	10.5708	10.9987	10.7655	11.1714	11.984	11.3641	11.1322	11.2297	11.2384	10.6446	11.2331	12.0235	11.3589
243.172	-1.05484	0.191681	-5.50312	3.73e-08	1.39e-05	Oplah	75475	5-oxoprolinase (ATP-hydrolysing)	ENSMUSG00000022562	Down Regulated	8.77722	8.69336	8.88865	9.0474	9.2128	8.46298	8.45454	8.08043	8.24968	8.06239	8.50783	8.73216	8.46656	8.30906	8.40842	8.52346	9.03586	8.59806	8.91556	8.81021
13.4678	-1.06421	0.34682	-3.06849	0.00215145	0.0310427	A330009N23Rik	380977	RIKEN cDNA A330009N23 gene	ENSMUSG00000097915	Down Regulated	7.15383	7.09205	7.08556	7.19256	7.16746	6.95305	6.93169	6.8788	6.91513	6.99401	7.04641	6.95232	7.11271	7.01335	7.06284	6.92423	6.76851	7.09662	7.08112	7.02318
203.049	-1.08603	0.309736	-3.50632	0.000454341	0.0116179	Plekhf1	72287	pleckstrin homology domain containing, family F (with FYVE domain) member 1	ENSMUSG00000074170	Down Regulated	8.49377	8.56632	8.30184	8.91492	9.16301	8.23735	8.31797	8.12013	8.06747	7.59389	8.50798	8.5822	8.31355	8.05506	8.29668	8.56508	8.32159	8.50706	9.3303	8.32418
7547.9	-1.0877	0.243455	-4.46777	7.9e-06	0.000681858	Glud1	14661	glutamate dehydrogenase 1	ENSMUSG00000021794	Down Regulated	12.844	13.0541	12.8418	13.5827	13.8763	12.5839	12.3615	11.7813	12.557	11.6785	12.8538	13.0707	12.6574	12.6212	12.7878	12.988	12.5291	12.9721	13.8547	12.781
8651.4	-1.08857	0.318964	-3.41283	0.000642915	0.0142396	Acsl5	433256	acyl-CoA synthetase long-chain family member 5	ENSMUSG00000024981	Down Regulated	13.2282	13.2333	13.0396	13.7892	14.2201	12.5029	12.5261	12.6891	12.6202	12.1334	12.9748	13.5977	12.8112	12.5681	12.5665	12.8777	12.7408	12.8429	14.2134	12.5739
18710.6	-1.08958	0.324638	-3.3563	0.000789922	0.016084	Slc15a1	56643	solute carrier family 15 (oligopeptide transporter), member 1	ENSMUSG00000025557	Down Regulated	14.0635	14.1354	14.1936	14.819	15.263	14.0468	13.7501	13.1728	13.5109	12.6033	13.8767	14.179	14.1404	13.8087	13.5092	14.1535	14.3137	14.1018	15.363	14.4171
36.6393	-1.09047	0.334697	-3.25808	0.0011217	0.0203383	Nrg2	100042150	neuregulin 2	ENSMUSG00000060275	Down Regulated	7.47488	7.79901	7.4043	7.38006	7.11756	7.11887	7.00789	7.25135	7.26576	7.14316	7.31323	7.39039	7.30897	7.54359	7.47257	7.63196	7.40236	7.30417	7.56502	7.38142
166.74	-1.09393	0.371587	-2.94394	0.00324063	0.0400884	Dao	13142	D-amino acid oxidase	ENSMUSG00000042096	Down Regulated	8.27657	8.51555	8.13885	8.69292	9.08824	8.05073	7.93919	7.97267	8.28607	7.53197	8.2654	8.84328	7.84417	7.97503	8.01095	8.26357	8.12361	8.0703	9.06317	8.1552
511.245	-1.09568	0.227468	-4.81685	1.46e-06	0.000209691	0610005C13Rik	71661	RIKEN cDNA 0610005C13 gene	ENSMUSG00000109644	Down Regulated	9.57894	9.5121	9.46489	9.81552	10.0888	9.05598	8.91027	8.78562	9.07786	8.55268	9.3116	9.60813	9.07234	8.92268	8.85548	9.53707	9.33392	9.46695	10.2629	9.52679
4650.34	-1.10656	0.321457	-3.44235	0.000576694	0.013427	Cyp2j6	13110	cytochrome P450, family 2, subfamily j, polypeptide 6	ENSMUSG00000052914	Down Regulated	12.3099	12.2682	12.0861	12.9679	13.2913	11.7256	11.6961	11.4194	12.0534	10.8252	11.9753	12.6846	12.0863	11.9924	11.8887	11.9296	11.9817	12.023	13.127	12.2123
419.225	-1.10771	0.251572	-4.40315	1.07e-05	0.000824873	Ptgr1	67103	prostaglandin reductase 1	ENSMUSG00000028378	Down Regulated	9.15827	9.31538	9.18268	9.64136	9.82233	8.56235	8.67953	8.42165	9.04199	8.50893	9.17517	9.20866	8.92656	8.83062	8.78401	9.2275	9.22249	9.23893	10.2371	9.15138
24.22	-1.11	0.273142	-4.06382	4.83e-05	0.00260291	Plcxd3	239318	phosphatidylinositol-specific phospholipase C, X domain containing 3	ENSMUSG00000049148	Down Regulated	7.36512	7.25613	7.34306	7.24206	7.25378	7.03987	7.08381	6.93335	7.0996	6.99275	7.38459	7.27685	7.39528	7.23103	7.25666	7.11794	7.29391	7.25803	7.16614	7.16199
88.043	-1.11233	0.245949	-4.52259	6.11e-06	0.000578767	Etnk2	214253	ethanolamine kinase 2	ENSMUSG00000070644	Down Regulated	8.09894	8.05988	8.07925	8.02269	8.19105	7.64467	7.54973	7.67127	7.73648	7.37666	7.9159	7.94353	7.70689	7.60073	7.62364	7.68247	7.80786	7.63801	8.28778	7.96719
38.6011	-1.12197	0.24656	-4.55047	5.35e-06	0.000528516	Cys1	12879	cystin 1	ENSMUSG00000062563	Down Regulated	7.52646	7.58031	7.61931	7.68417	7.83301	7.34019	7.38725	7.12024	7.30853	7.21806	7.2197	7.3968	7.35695	7.25125	7.32414	7.31842	7.38569	7.36608	7.08093	7.44796
2156.81	-1.12552	0.371892	-3.02648	0.00247422	0.0338522	Fos	14281	FBJ osteosarcoma oncogene	ENSMUSG00000021250	Down Regulated	11.7795	11.7649	11.1159	11.6506	12.1377	10.8217	10.9442	10.6248	10.9139	9.86869	10.2179	11.3543	10.6565	9.94839	11.1301	11.1916	12.2715	10.981	10.6927	10.8453
20.4451	-1.12575	0.384701	-2.92629	0.00343027	0.0418034	Ch25h	12642	cholesterol 25-hydroxylase	ENSMUSG00000050370	Down Regulated	7.40137	7.15006	7.25377	7.3305	7.51275	6.91224	7.16326	6.9265	7.13229	7.11506	7.10674	7.08993	6.96302	7.19573	7.37356	7.10764	6.90891	6.86472	7.1887	7.02958
630.242	-1.12613	0.2007	-5.61099	2.01e-08	8.67e-06	Fkbp5	14229	FK506 binding protein 5	ENSMUSG00000024222	Down Regulated	10.5902	10.404	9.60249	9.69792	9.57627	9.23705	9.19619	9.10442	9.13391	9.09008	9.33287	9.5431	9.59578	9.41922	9.37726	9.61188	10.0843	9.80603	9.46731	9.72801
87.7452	-1.12687	0.388447	-2.90096	0.00372024	0.0436194	Mro	71263	maestro	ENSMUSG00000064036	Down Regulated	7.84079	7.80553	7.75888	8.18943	8.46077	7.57441	7.61884	7.4868	7.72558	7.36448	7.9177	8.10066	7.51975	7.70805	7.53076	7.63704	7.60488	7.79512	8.68112	7.71634
53.9446	-1.13318	0.268893	-4.21426	2.51e-05	0.00161082	Col13a1	12817	collagen, type XIII, alpha 1	ENSMUSG00000058806	Down Regulated	7.72342	7.74905	7.7158	7.58911	7.68183	7.25607	7.23077	7.3135	7.50664	7.18907	7.74445	7.57719	7.48927	7.56602	7.81032	7.6117	7.33414	7.75246	7.81671	7.34306
14655.2	-1.13943	0.199318	-5.71665	1.09e-08	4.95e-06	Xpnpep2	170745	X-prolyl aminopeptidase (aminopeptidase P) 2, membrane-bound	ENSMUSG00000037005	Down Regulated	14.3441	14.2718	14.1326	14.5589	14.5152	13.499	13.481	13.0762	13.5405	12.3101	13.637	14.1611	13.5544	13.1346	13.4723	13.8729	13.7837	14.0661	14.1992	13.7103
40.1224	-1.14581	0.28512	-4.0187	5.85e-05	0.00296047	Pcdh8	18530	protocadherin 8	ENSMUSG00000036422	Down Regulated	7.46129	7.52974	7.57525	7.51758	7.64496	7.24785	7.16874	7.22519	7.22168	7.15359	7.6756	7.58129	7.12105	7.77477	7.39553	7.42923	7.3578	7.41902	7.24333	7.37245
147.762	-1.15057	0.29533	-3.89587	9.78e-05	0.00412347	Nrn1	68404	neuritin 1	ENSMUSG00000039114	Down Regulated	8.18086	8.59273	8.25864	8.68892	8.84025	7.74483	7.91449	7.86163	8.26643	7.6959	8.44568	8.6079	8.17386	7.95121	8.09291	8.01332	7.92745	7.90555	8.55803	7.83636
683.989	-1.15325	0.275422	-4.1872	2.82e-05	0.00173374	Cyp4b1	13120	cytochrome P450, family 4, subfamily b, polypeptide 1	ENSMUSG00000028713	Down Regulated	9.49016	9.82796	9.54604	10.0726	10.4556	8.96799	9.2109	8.96493	9.27836	8.64212	9.67804	9.77265	9.3636	9.20406	9.28606	10.251	9.63669	10.1847	11.0087	9.54353
152.983	-1.15828	0.398846	-2.90408	0.00368333	0.0434974	Vwce	71768	von Willebrand factor C and EGF domains	ENSMUSG00000043789	Down Regulated	8.23999	8.7052	7.91991	8.60651	8.68061	8.00363	7.93328	7.75268	8.1671	7.18962	8.09209	8.40638	7.64427	8.06619	8.24363	8.61427	8.04775	8.76549	8.8046	7.73882
152.228	-1.16527	0.311019	-3.74664	0.000179218	0.00606935	Slc47a1	67473	solute carrier family 47, member 1	ENSMUSG00000010122	Down Regulated	8.37239	8.48318	8.15147	8.40281	8.88725	8.19998	8.14128	7.49808	7.92442	7.28947	8.21697	8.30049	8.16302	8.09648	7.99497	8.17968	8.21968	8.48184	8.70669	8.29218
91.9796	-1.17046	0.307919	-3.80119	0.000144005	0.0052221	Pik3c2g	18705	phosphatidylinositol-4-phosphate 3-kinase catalytic subunit type 2 gamma	ENSMUSG00000030228	Down Regulated	7.82081	8.00446	7.68046	8.44516	8.4418	7.60945	7.51108	7.61702	7.57507	7.68478	7.98124	8.00817	7.56721	7.92968	7.9434	7.72763	7.53252	7.88549	8.25796	7.74538
5656.05	-1.18946	0.261094	-4.55567	5.22e-06	0.000521911	Aqp1	11826	aquaporin 1	ENSMUSG00000004655	Down Regulated	12.5716	12.8024	12.6775	13.2615	13.4081	12.0084	12.1755	11.2674	12.3153	10.9107	12.378	12.7699	11.9614	12.0452	12.3112	12.621	12.2602	12.6755	13.3009	12.1359
5509.5	-1.19397	0.239471	-4.98586	6.17e-07	0.000107562	Susd2	71733	sushi domain containing 2	ENSMUSG00000006342	Down Regulated	12.5507	12.4977	12.6591	13.1729	13.6986	12.1135	11.9593	11.8322	11.8958	11.2559	12.0397	12.5976	12.4046	12.0932	11.8832	12.289	12.6168	12.0585	13.2281	12.4239
20656.2	-1.19516	0.352358	-3.3919	0.000694091	0.0148861	Fabp2	14079	fatty acid binding protein 2, intestinal	ENSMUSG00000023057	Down Regulated	14.4199	14.3835	14.5536	14.9266	15.2586	13.481	13.9069	13.4408	14.1458	12.1633	14.1521	14.8561	14.0655	14.113	13.797	14.37	14.0209	14.3773	15.4597	14.075
724.621	-1.1955	0.228964	-5.22136	1.78e-07	4.48e-05	Ppargc1a	19017	peroxisome proliferative activated receptor, gamma, coactivator 1 alpha	ENSMUSG00000029167	Down Regulated	9.8094	10.0164	9.69446	10.4228	10.7528	9.43935	9.37955	8.9756	9.51854	8.66913	9.63305	9.86783	9.65089	9.46822	9.74064	9.89229	9.75826	9.72233	10.3287	9.88757
92.37	-1.2007	0.30183	-3.97808	6.95e-05	0.00332439	Col4a3	12828	collagen, type IV, alpha 3	ENSMUSG00000079465	Down Regulated	8.01587	8.35641	7.74836	8.02536	8.31786	7.41403	7.75028	7.5489	7.62017	7.56692	7.97682	8.01926	7.70397	7.72773	8.13161	7.86533	7.57926	7.93786	8.27293	7.45627
26.8669	-1.20575	0.408152	-2.95416	0.0031352	0.0392033	9530026P05Rik	330385	RIKEN cDNA 9530026P05 gene	ENSMUSG00000097462	Down Regulated	7.29071	7.39217	7.15275	7.33483	7.51855	7.12411	7.05564	7.10428	6.99385	6.98583	6.93051	7.30674	7.09101	7.51523	7.00713	7.30123	7.55647	7.56161	7.24423	7.13765
24.8492	-1.21821	0.332211	-3.66697	0.000245445	0.00756221	Fgf14	14169	fibroblast growth factor 14	ENSMUSG00000025551	Down Regulated	7.33575	7.46294	7.30709	7.41221	7.21539	6.8996	7.04523	6.97157	7.18463	7.11138	7.4297	7.24877	7.24419	7.11835	7.37196	7.07283	7.17389	7.03784	7.41077	7.15705
325.986	-1.22905	0.312955	-3.92724	8.59e-05	0.00380965	Uap1l1	227620	UDP-N-acteylglucosamine pyrophosphorylase 1-like 1	ENSMUSG00000026956	Down Regulated	9.40056	9.50648	8.53914	9.61132	9.80143	8.77186	8.77993	8.25072	8.37254	8.60266	8.49847	9.58525	8.84757	8.49025	8.41568	8.46777	8.77261	8.5234	9.08492	8.53476
28.7989	-1.23568	0.398956	-3.0973	0.00195295	0.0292336	Sdr16c5	242285	short chain dehydrogenase/reductase family 16C, member 5	ENSMUSG00000028236	Down Regulated	7.47461	7.24258	7.29397	7.60118	7.58625	7.18318	7.31998	6.97061	7.21898	6.7265	7.36982	7.38572	7.05227	7.17043	7.20918	7.24094	7.24186	7.36205	7.35736	7.17597
2229.57	-1.23728	0.331383	-3.73368	0.000188704	0.0062867	Samd8	67630	sterile alpha motif domain containing 8	ENSMUSG00000021770	Down Regulated	11.3048	11.3115	11.459	12.1169	12.4191	10.554	10.7774	10.5963	10.9373	10.3171	11.1418	11.6296	10.6419	10.6614	10.8147	10.9056	10.6876	10.9155	12.184	10.6662
1813.48	-1.23777	0.330502	-3.74512	0.000180306	0.00609361	Nr1d1	217166	nuclear receptor subfamily 1, group D, member 1	ENSMUSG00000020889	Down Regulated	10.7945	10.833	10.8173	10.9742	11.1714	10.5149	10.2985	8.76417	9.84262	9.00415	10.2701	10.6681	11.1361	10.904	10.9486	11.5035	11.772	11.3061	12.0279	11.6849
1353.96	-1.24604	0.226213	-5.50828	3.62e-08	1.38e-05	Prr15	78004	proline rich 15	ENSMUSG00000045725	Down Regulated	10.8148	10.7991	10.6049	11.0666	11.2625	10.3101	9.94663	9.26043	10.0833	9.29282	10.1232	10.6984	10.3688	10.118	10.1418	10.7965	10.8225	10.6772	11.4596	10.8212
27.5815	-1.26587	0.36858	-3.43445	0.00059375	0.0136307	A930038B10Rik	320323	RIKEN cDNA A930038B10 gene	ENSMUSG00000097310	Down Regulated	7.36233	7.35642	7.17587	7.35745	7.43795	7.11017	7.09164	6.9913	7.07554	6.89399	7.1746	7.60191	7.26615	7.38378	7.17459	7.01526	7.31763	7.45268	7.48794	7.17249
41.37	-1.27315	0.422671	-3.01217	0.0025939	0.0349643	Ajm1	381353	apical junction component 1	ENSMUSG00000029419	Down Regulated	7.29268	7.94708	7.32541	7.59759	7.40405	7.2795	7.18798	7.06505	7.29812	6.9464	7.44648	7.90404	7.50488	7.23212	7.42298	7.37003	7.23867	7.74191	7.62786	7.1957
531.247	-1.27356	0.240248	-5.30102	1.15e-07	3.56e-05	Mylip	218203	myosin regulatory light chain interacting protein	ENSMUSG00000038175	Down Regulated	9.67057	9.75794	9.65181	10.209	10.01	8.76523	8.99757	8.41332	9.45032	8.66939	9.45632	9.91239	9.20127	9.26972	9.22442	9.2554	9.34033	9.50911	9.74326	9.03188
14.4751	-1.27438	0.376234	-3.38719	0.000706112	0.0150165	4930549G23Rik	75286	RIKEN cDNA 4930549G23 gene	ENSMUSG00000118134	Down Regulated	7.10391	6.99748	7.06785	7.1852	7.19399	6.91897	6.78276	7.04999	6.78466	6.87941	7.01885	6.97888	7.09184	7.12854	7.22124	6.98909	7.16221	7.05893	7.0551	7.11929
1621.74	-1.27642	0.333877	-3.82303	0.000131823	0.00491069	Acy1	109652	aminoacylase 1	ENSMUSG00000023262	Down Regulated	10.9424	11.0664	10.7144	11.3291	11.8461	10.4073	10.2595	9.80363	10.388	9.33321	10.5991	11.2921	10.4548	10.3843	10.4395	10.6803	10.7887	10.6777	11.8813	10.4209
66.7913	-1.2803	0.286387	-4.47051	7.8e-06	0.000680338	Piwil2	57746	piwi-like RNA-mediated gene silencing 2	ENSMUSG00000033644	Down Regulated	8.07008	8.05632	7.88319	8.03112	7.75374	7.50824	7.6174	7.27455	7.53884	7.25448	7.65435	7.93088	7.47782	7.5064	7.66023	7.50636	7.82175	7.2371	7.60494	7.75568
5235.65	-1.28753	0.435599	-2.95577	0.00311888	0.0390539	Cyp4v3	102294	cytochrome P450, family 4, subfamily v, polypeptide 3	ENSMUSG00000079057	Down Regulated	12.0923	12.2112	12.1818	13.0818	13.7437	11.862	11.9149	11.5084	11.8037	10.282	12.2898	12.5147	12.046	11.6358	11.8378	12.079	12.1579	12.3404	13.9641	12.2226
23.9914	-1.2922	0.453691	-2.84819	0.00439691	0.0487108	Lrrtm3	216028	leucine rich repeat transmembrane neuronal 3	ENSMUSG00000042846	Down Regulated	7.28681	7.52456	7.25576	7.17607	7.28838	6.98935	7.15097	6.83826	7.16477	6.85118	7.23029	7.68402	7.0656	7.26828	7.09612	7.24839	7.35898	7.13822	6.93115	7.17278
538.519	-1.29294	0.403951	-3.20074	0.00137077	0.0231767	Sema7a	20361	sema domain, immunoglobulin domain (Ig), and GPI membrane anchor, (semaphorin) 7A	ENSMUSG00000038264	Down Regulated	9.58578	9.64964	9.28608	10.2206	10.5791	8.79899	8.96521	8.87278	9.26355	8.78546	9.43818	10.2446	8.97354	8.76183	9.04088	9.2234	8.92576	9.01678	10.2333	8.97517
242.669	-1.29583	0.325976	-3.97523	7.03e-05	0.00334055	Cyp2j9	74519	cytochrome P450, family 2, subfamily j, polypeptide 9	ENSMUSG00000015224	Down Regulated	8.8762	8.75702	8.55808	9.11795	9.44783	8.42662	8.30902	7.77429	8.51131	7.6483	8.4773	8.68163	8.63666	8.40759	8.34835	8.4728	8.35912	8.5397	9.47516	8.64261
17.7763	-1.3055	0.441653	-2.95595	0.0031171	0.0390539	C730002L08Rik	320155	RIKEN cDNA C730002L08 gene	ENSMUSG00000114469	Down Regulated	7.12452	7.35154	6.99361	7.01524	6.95398	7.05766	6.80273	6.77702	6.87697	6.82524	7.17004	7.20973	7.29315	7.33873	7.13015	7.2883	7.227	7.01387	6.98192	7.30991
66.1852	-1.31536	0.407516	-3.22775	0.00124766	0.0218021	Pbld1	68371	phenazine biosynthesis-like protein domain containing 1	ENSMUSG00000112129	Down Regulated	8.02469	7.9621	7.69101	7.87505	7.73269	7.46339	7.68471	6.93828	7.52021	6.98065	7.86457	7.62547	7.47485	7.64516	7.6056	7.68806	8.12616	7.45275	7.97162	7.45794
2799.03	-1.32769	0.202948	-6.54203	6.07e-11	7.26e-08	Mt1	17748	metallothionein 1	ENSMUSG00000031765	Down Regulated	12.0842	12.5029	11.916	12.1304	12.3724	11.0082	10.6871	10.7252	11.0366	11.2858	11.7019	11.587	11.1625	11.0065	10.7547	11.1791	11.8614	10.7886	11.4096	11.3817
107.029	-1.35358	0.312414	-4.33265	1.47e-05	0.00104086	Grin2d	14814	glutamate receptor, ionotropic, NMDA2D (epsilon 4)	ENSMUSG00000002771	Down Regulated	8.00372	8.21329	8.09187	8.50359	8.53297	7.48555	7.76203	7.69375	7.67727	7.613	8.06299	8.33085	7.46423	7.84714	7.74271	7.84451	7.74602	7.96959	8.44338	7.79577
12.7444	-1.35596	0.389953	-3.47724	0.000506607	0.0125435	Fsd1	240121	fibronectin type 3 and SPRY domain-containing protein	ENSMUSG00000011589	Down Regulated	7.00341	7.283	7.23313	7.26202	7.09931	6.89611	6.8767	6.8586	6.88074	7.03994	6.90026	6.87117	6.89742	6.87532	6.99272	6.99772	7.16948	6.86976	6.999	6.97846
3416.8	-1.38385	0.419027	-3.30252	0.000958193	0.0183908	Anxa13	69787	annexin A13	ENSMUSG00000055114	Down Regulated	11.8344	12.0479	11.8985	12.8147	12.7552	10.876	11.22	10.5593	11.7573	10.2145	11.9483	12.5838	11.1201	11.3064	11.3608	11.4325	11.0588	11.5849	12.929	11.1955
1239.42	-1.40096	0.341561	-4.10164	4.1e-05	0.00231868	Slc5a11	233836	solute carrier family 5 (sodium/glucose cotransporter), member 11	ENSMUSG00000030769	Down Regulated	10.5329	10.7995	10.5123	11.0982	11.5374	10.0926	10.1283	9.42314	9.93494	8.54378	10.3295	10.7891	10.1634	9.79126	10.2026	10.4022	10.3722	10.4527	11.286	10.2599
1193.47	-1.40165	0.394664	-3.5515	0.000383042	0.0104467	Ephx2	13850	epoxide hydrolase 2, cytoplasmic	ENSMUSG00000022040	Down Regulated	10.478	10.4597	10.3236	11.0463	11.6058	9.86642	9.9709	9.51387	9.96062	8.56379	10.1867	10.8428	10.1614	9.81048	9.92585	10.1275	10.2305	10.3482	11.5466	10.2998
1828.55	-1.40373	0.427438	-3.28405	0.00102326	0.0191028	Vnn1	22361	vanin 1	ENSMUSG00000037440	Down Regulated	11.1561	11.2709	11.3164	11.8523	11.9284	10.0657	10.7708	10.1754	10.7352	8.87153	11.2962	11.6234	10.3451	10.3681	10.6806	10.7013	10.0034	10.9384	11.7347	9.94117
426.153	-1.43064	0.278806	-5.13132	2.88e-07	6.41e-05	Pipox	19193	pipecolic acid oxidase	ENSMUSG00000017453	Down Regulated	9.5138	9.74873	9.26288	9.80156	10.0533	8.75596	8.80259	8.4625	8.97547	8.14462	8.9523	9.70038	8.7039	8.82903	8.88886	8.86926	9.05196	9.0828	9.77604	8.99656
440.801	-1.44574	0.483056	-2.9929	0.00276341	0.03633	Spns2	216892	SPNS lysolipid transporter 2, sphingosine-1-phosphate	ENSMUSG00000040447	Down Regulated	9.2424	9.36704	9.04134	9.93664	10.4128	8.45022	8.77312	8.62502	8.93316	8.36098	9.38993	9.85956	8.66982	8.62972	9.04813	8.96271	8.27283	8.90267	10.3507	8.64106
2074.99	-1.45561	0.419196	-3.47238	0.000515874	0.0126962	Gramd1b	235283	GRAM domain containing 1B	ENSMUSG00000040111	Down Regulated	11.3466	11.5166	11.2495	11.9057	12.1761	10.1616	10.6808	10.3019	10.8471	9.31137	11.229	11.7614	10.6995	10.2637	10.6921	10.9878	10.4168	11.0809	12.1629	10.4917
122.524	-1.4786	0.315016	-4.69372	2.68e-06	0.000318657	Acox2	93732	acyl-Coenzyme A oxidase 2, branched chain	ENSMUSG00000021751	Down Regulated	8.62765	8.813	7.90866	8.38524	8.02845	8.07885	7.65419	7.44098	7.4708	7.64832	7.87008	8.05747	8.0298	8.02893	7.69238	8.28052	8.27275	8.21022	7.74537	8.31524
58.846	-1.47933	0.522869	-2.82926	0.00466551	0.0499996	Cdh9	12565	cadherin 9	ENSMUSG00000025370	Down Regulated	8.15313	8.06326	7.67542	7.80864	7.62163	7.63366	7.48977	6.89445	7.53636	6.47476	7.33708	7.6925	7.74937	7.33623	7.49535	7.61001	7.6302	7.49816	7.75746	7.62703
732.204	-1.49745	0.515185	-2.90662	0.00365359	0.0433643	Ms4a10	69826	membrane-spanning 4-domains, subfamily A, member 10	ENSMUSG00000024731	Down Regulated	9.84136	9.82422	9.63313	10.6837	11.1328	9.16412	9.21966	9.06046	9.51209	8.58579	9.59635	10.5007	9.03748	8.85672	9.1401	9.25414	9.20933	9.49179	11.1877	9.27562
262.441	-1.50375	0.415575	-3.61847	0.000296347	0.00873638	Cyp27a1	104086	cytochrome P450, family 27, subfamily a, polypeptide 1	ENSMUSG00000026170	Down Regulated	8.83042	9.09028	8.5306	9.21385	9.66384	8.43652	8.36993	7.67052	8.40758	7.74961	8.52744	8.87804	8.37683	8.15437	8.35593	8.55872	8.43731	8.74079	9.75563	8.51649
874.755	-1.5104	0.446952	-3.37934	0.000726613	0.015275	Slc7a15	328059	solute carrier family 7 (cationic amino acid transporter, y+ system), member 15	ENSMUSG00000020600	Down Regulated	10.5787	10.4285	10.3824	10.8061	11.2177	8.83452	9.54251	9.74293	9.76949	9.09349	9.86434	10.2913	9.22931	8.63189	9.47211	9.82562	9.16357	10.2277	10.921	8.82674
72.5166	-1.51067	0.480687	-3.14274	0.00167374	0.0266094	Grin2a	14811	glutamate receptor, ionotropic, NMDA2A (epsilon 1)	ENSMUSG00000059003	Down Regulated	7.83794	7.5947	7.58295	8.44657	7.65327	7.19946	7.67054	7.22493	7.42476	6.92531	7.85135	7.84493	7.76546	7.0667	7.62698	7.67201	7.55	8.18564	8.33852	7.82677
34.1345	-1.51572	0.399431	-3.7947	0.000147821	0.00526725	Cyp2c67	545288	cytochrome P450, family 2, subfamily c, polypeptide 67	ENSMUSG00000062624	Down Regulated	7.47445	7.50505	7.26691	7.65001	7.64797	7.21189	7.30162	6.75217	7.20838	6.77047	7.31165	7.48225	7.42704	7.2333	7.26312	7.28387	7.40558	7.37632	7.55435	7.31534
40.484	-1.51733	0.274196	-5.53375	3.13e-08	1.22e-05	Cfap57	68625	cilia and flagella associated protein 57	ENSMUSG00000028730	Down Regulated	7.58936	7.77347	7.65944	7.68892	7.67901	7.32865	7.0985	7.04958	7.33927	7.11516	7.39445	7.55651	7.46812	7.0955	7.39704	7.45046	7.37941	7.3126	7.42341	7.30022
570.968	-1.53029	0.414348	-3.69325	0.00022141	0.00698508	Tmem144	70652	transmembrane protein 144	ENSMUSG00000027956	Down Regulated	9.7421	9.87053	9.24712	10.34	10.5015	8.73489	9.07895	8.77374	9.19263	8.20987	9.65608	10.2663	9.07285	8.81673	9.23589	9.13417	9.30857	9.28588	10.3785	8.98562
9.19146	-1.54264	0.53552	-2.88063	0.00396879	0.0454912	Asb4	65255	ankyrin repeat and SOCS box-containing 4	ENSMUSG00000042607	Down Regulated	7.11898	7.10036	6.83348	6.80296	6.95779	6.73901	6.83135	6.68483	6.78146	6.83111	7.10578	6.87971	7.09441	6.95751	6.96778	6.94964	6.95863	7.02584	6.80757	6.94452
1976.5	-1.55034	0.390194	-3.97326	7.09e-05	0.00334161	Abcc2	12780	ATP-binding cassette, sub-family member 2	ENSMUSG00000025194	Down Regulated	11.4514	11.5333	11.4434	11.7209	11.7851	10.5075	10.8268	9.11675	10.6106	8.74482	10.9285	11.3697	10.4913	10.2494	10.9395	11.2091	10.8659	11.2064	11.7816	11.2175
116.559	-1.56746	0.552773	-2.83563	0.00457349	0.0496451	Zbtb16	235320	zinc finger and BTB domain containing 16	ENSMUSG00000066687	Down Regulated	9.28258	8.72513	7.69673	7.88068	7.90543	7.92966	7.9783	7.13734	7.51065	7.62081	7.54763	8.06719	8.00444	8.24954	7.553	8.00571	8.12139	7.48133	7.80066	8.36326
73.9305	-1.57414	0.46699	-3.37082	0.00074946	0.0155532	Tcf23	69852	transcription factor 23	ENSMUSG00000006642	Down Regulated	8.367	8.28931	8.06954	7.39834	7.35312	7.47505	7.50068	7.18526	7.63165	6.7705	7.68321	7.98592	7.51752	7.61508	7.72803	7.88329	7.82623	7.98796	7.64683	7.76861
2558.78	-1.57454	0.478755	-3.28882	0.00100609	0.0189115	Creb3l3	208677	cAMP responsive element binding protein 3-like 3	ENSMUSG00000035041	Down Regulated	11.7299	11.6875	11.589	12.3396	12.5706	10.0748	10.8619	10.564	11.1798	9.74091	10.7836	12.0572	10.5533	10.5292	10.6495	11.1344	10.6161	11.445	12.8565	10.3987
26.1637	-1.5802	0.521463	-3.03033	0.00244289	0.0335918	Slc2a7	435818	solute carrier family 2 (facilitated glucose transporter), member 7	ENSMUSG00000062064	Down Regulated	7.19981	7.40688	7.15933	7.50516	7.74384	7.17953	7.05731	7.04234	6.7802	7.05707	7.09385	7.43195	7.17822	7.00233	7.21593	7.07805	7.04149	7.11513	7.76286	7.03835
958.413	-1.58053	0.186521	-8.4737	2.38e-17	1.3e-13	Nr1d2	353187	nuclear receptor subfamily 1, group D, member 2	ENSMUSG00000021775	Down Regulated	10.3648	10.3284	10.5329	10.6623	10.8388	9.57235	9.42264	8.72895	9.48536	8.85094	9.65921	9.75013	9.75084	9.76361	10.1498	10.5753	10.5664	10.4622	10.3988	10.6722
11954.5	-1.59033	0.473332	-3.35987	0.000779799	0.0159971	Ano6	105722	anoctamin 6	ENSMUSG00000064210	Down Regulated	13.6971	13.9286	13.7106	14.4972	14.7112	12.3836	13.0438	11.9671	13.375	11.4508	13.7265	14.1533	12.7784	12.6112	13.3334	13.5461	12.6757	13.4516	14.7515	12.6698
922.364	-1.59998	0.497279	-3.21746	0.00129331	0.0223615	Igf2	16002	insulin-like growth factor 2	ENSMUSG00000048583	Down Regulated	10.3285	10.8219	9.86753	10.9433	11.257	9.31629	9.50279	9.08523	9.90098	8.86228	10.4399	10.908	9.38371	9.06817	9.67804	9.87062	8.80238	9.36841	10.9926	9.2871
3624.44	-1.61461	0.467227	-3.45574	0.000548788	0.0131701	St3gal1	20442	ST3 beta-galactoside alpha-2,3-sialyltransferase 1	ENSMUSG00000013846	Down Regulated	12.7324	12.5092	12.101	12.8451	12.9314	11.2769	11.4184	10.2576	11.855	9.88496	11.967	12.9398	11.2594	10.9231	11.3931	11.0835	10.96	11.4509	12.2829	10.8215
395.375	-1.63	0.479264	-3.40104	0.000671294	0.0145431	Rab30	75985	RAB30, member RAS oncogene family	ENSMUSG00000030643	Down Regulated	9.83376	9.86424	8.99793	9.3555	9.57222	8.21153	8.30049	7.87914	9.0834	8.34623	8.78279	10.1397	8.78459	8.61581	9.03732	8.63257	8.51664	9.36472	9.88703	8.40359
35.7207	-1.63994	0.430079	-3.81313	0.00013722	0.00505565	Plk5	216166	polo like kinase 5	ENSMUSG00000035486	Down Regulated	7.35179	7.66359	7.56999	7.91659	7.28668	7.21451	7.11215	6.90956	7.3204	6.74532	7.56835	7.48526	7.36029	7.07889	7.39621	7.49881	7.24293	7.41164	7.39607	7.10644
40.2525	-1.67522	0.312797	-5.35562	8.53e-08	2.8e-05	Klf15	66277	Kruppel-like transcription factor 15	ENSMUSG00000030087	Down Regulated	7.80658	7.80175	7.39178	7.71414	7.55443	7.185	7.25653	7.20976	7.17065	6.91021	7.31108	7.51922	7.45814	7.08598	7.37111	7.42259	7.39166	7.52048	7.52559	7.34324
17.524	-1.75485	0.45672	-3.8423	0.000121886	0.00466977	Cyp2c23	226143	cytochrome P450, family 2, subfamily c, polypeptide 23	ENSMUSG00000025197	Down Regulated	6.99079	7.16905	7.13379	7.49958	7.39956	6.95132	6.97227	6.74501	6.92971	6.87234	6.97827	7.17598	7.02912	7.00019	7.04855	7.16011	6.87855	7.03965	7.40053	7.21819
3038.23	-1.81661	0.489119	-3.71404	0.000203979	0.00662063	Tm4sf5	75604	transmembrane 4 superfamily member 5	ENSMUSG00000018919	Down Regulated	11.8764	11.9755	11.7146	12.5955	12.9997	10.2154	10.736	10.3445	11.3022	10.1521	11.7418	12.3803	10.5822	10.5448	11.039	11.4699	10.7701	11.4891	12.9756	10.52
105.654	-1.82989	0.589169	-3.10588	0.00189716	0.0287276	Slc5a4a	64452	solute carrier family 5, member 4a	ENSMUSG00000020229	Down Regulated	8.3241	8.11686	7.85041	8.12815	8.34283	7.69163	7.74224	6.79496	7.47669	6.73097	8.09189	8.08137	8.12078	7.78669	8.08086	8.32968	7.67426	7.97959	8.60508	7.86959
1765.49	-1.84177	0.456717	-4.03263	5.52e-05	0.00284301	Maob	109731	monoamine oxidase B	ENSMUSG00000040147	Down Regulated	10.9169	11.1482	10.9948	11.6892	12.2375	10.0146	10.2019	9.17371	10.47	8.61833	10.9577	11.6056	10.4434	10.29	10.6008	10.7471	10.4296	10.821	12.0333	10.4256
43.051	-1.84327	0.526089	-3.50372	0.000458815	0.0116596	Smcp	17235	sperm mitochondria-associated cysteine-rich protein	ENSMUSG00000074435	Down Regulated	7.73782	7.72415	7.39759	7.88552	7.96177	7.43098	7.24551	6.97288	7.26136	6.47476	7.38305	8.07187	7.32135	7.24404	7.33275	7.16996	7.26462	7.2227	7.22047	7.38121
8.36099	-1.84699	0.550787	-3.35336	0.000798379	0.0162021	Adra1b	11548	adrenergic receptor, alpha 1b	ENSMUSG00000050541	Down Regulated	7.09475	7.16916	7.02398	6.96473	6.94856	6.73221	6.93274	6.67058	6.80476	6.65554	6.82586	7.01702	6.82086	7.01659	6.72037	7.01681	6.86043	6.93116	6.84166	6.80141
138.514	-1.85179	0.362835	-5.10369	3.33e-07	7.09e-05	Lrrn1	16979	leucine rich repeat protein 1, neuronal	ENSMUSG00000034648	Down Regulated	8.69134	8.73342	8.14158	8.74401	8.83279	7.72752	7.92403	7.45781	7.93721	7.2356	8.31245	8.6842	7.78382	7.82392	7.93182	7.96774	7.78135	8.0888	8.33988	7.63735
10.6793	-1.85577	0.477417	-3.88711	0.000101444	0.0042052	Glyat	107146	glycine-N-acyltransferase	ENSMUSG00000063683	Down Regulated	7.05383	7.20727	7.22031	6.98149	7.04472	6.766	6.77664	6.73013	6.75591	6.96509	6.86159	7.10979	6.88329	6.88774	6.88219	6.89768	7.15983	6.91779	6.92084	6.9874
7103.61	-1.93033	0.462346	-4.17507	2.98e-05	0.00181909	Slc7a8	50934	solute carrier family 7 (cationic amino acid transporter, y+ system), member 8	ENSMUSG00000022180	Down Regulated	12.838	13.0928	12.9395	13.8773	14.5323	11.7181	11.9947	11.5254	12.1462	11.0718	12.8326	13.2858	11.9469	11.7625	12.3104	12.4308	11.9823	12.3664	14.1041	11.8209
20.9485	-1.94668	0.592516	-3.28545	0.00101819	0.0190514	Ros1	19886	Ros1 proto-oncogene	ENSMUSG00000019893	Down Regulated	7.22555	7.3822	7.14992	7.38026	7.92957	7.078	7.09524	6.95777	6.82384	6.90698	7.23959	7.38047	6.90587	6.88286	6.97395	6.78739	6.88133	6.86621	7.37735	6.85354
531.813	-1.95176	0.485504	-4.02006	5.82e-05	0.00295256	Rab11fip5	52055	RAB11 family interacting protein 5 (class I)	ENSMUSG00000051343	Down Regulated	9.80504	10.0723	9.71483	10.2562	10.6791	8.71695	8.86051	8.33343	9.02021	8.25805	9.86007	10.4832	8.76233	8.68368	9.02833	8.68529	8.35626	8.39731	9.91772	8.69761
11.109	-1.96282	0.594024	-3.30428	0.00095221	0.0183404	Zeb1os1	791318	zinc finger E-box binding homeobox 1, opposite strand 1	ENSMUSG00000063087	Down Regulated	6.91228	7.07452	6.91242	7.42001	7.47114	6.80889	6.87335	6.79018	6.75736	6.83141	6.83542	6.79756	6.65302	6.81105	7.00228	6.77053	6.85552	7.09485	6.95493	7.09529
24.055	-2.00592	0.510188	-3.93174	8.43e-05	0.00377682	Efhd1	98363	EF hand domain containing 1	ENSMUSG00000026255	Down Regulated	7.84729	7.35925	7.04273	7.35954	7.23312	7.02172	7.07217	6.97269	6.89854	6.71578	6.96129	7.4215	7.02391	6.91093	7.26256	7.09868	7.18369	7.34097	7.4056	7.27965
292.784	-2.03271	0.56948	-3.56942	0.000357778	0.00992273	Aqp3	11828	aquaporin 3	ENSMUSG00000028435	Down Regulated	9.19671	8.93737	8.7175	9.02438	9.13729	7.67103	8.26608	7.31904	8.30431	7.03425	9.07144	9.42554	8.33825	8.47566	8.81736	9.22443	8.43824	8.87834	10.1856	8.34378
16.9819	-2.04394	0.662574	-3.08484	0.0020366	0.0299135	Cntn2	21367	contactin 2	ENSMUSG00000053024	Down Regulated	6.85796	6.97077	7.40575	6.89647	7.03585	6.85997	6.79623	6.47476	6.65869	6.82267	6.92007	7.66417	7.05599	7.02588	7.36983	6.92443	6.97451	7.16255	7.20842	7.49575
1352.19	-2.17802	0.572783	-3.80252	0.000143233	0.00521718	Adh1	11522	alcohol dehydrogenase 1 (class I)	ENSMUSG00000074207	Down Regulated	10.844	11.2687	10.9214	11.7734	11.6891	9.12243	9.94986	8.57251	10.1946	8.68303	10.6889	11.1532	9.32011	9.07031	10.541	10.4728	9.31885	10.4664	11.6379	9.28365
2148.96	-2.22639	0.74335	-2.99508	0.00274376	0.0362101	Apoc3	11814	apolipoprotein C-III	ENSMUSG00000032081	Down Regulated	11.1855	11.5512	10.6477	11.9322	13.0426	10.0716	10.1435	9.69531	10.4203	8.50797	11.3155	12.1446	9.84314	9.76819	9.93472	10.0637	9.78448	10.1118	13.0577	9.85648
628.664	-2.24474	0.408725	-5.49206	3.97e-08	1.45e-05	Slc2a5	56485	solute carrier family 2 (facilitated glucose transporter), member 5	ENSMUSG00000028976	Down Regulated	9.31625	9.99333	9.68437	10.3244	10.8354	8.7533	8.6726	8.31774	8.51252	7.96392	9.43177	9.66045	9.22425	8.79361	9.25879	9.88172	9.69954	9.30232	11.1002	9.54416
50.9601	-2.24733	0.565027	-3.97738	6.97e-05	0.00332439	Nr1i3	12355	nuclear receptor subfamily 1, group I, member 3	ENSMUSG00000005677	Down Regulated	7.60481	7.71094	7.58548	7.88997	8.33879	7.03603	7.30687	7.11839	7.16528	6.97647	7.36816	7.73385	6.90672	7.31445	7.05965	7.20437	7.33639	7.35348	8.46977	7.30462
16.1572	-2.3167	0.585481	-3.95691	7.59e-05	0.00343777	Slc6a3	13162	solute carrier family 6 (neurotransmitter transporter, dopamine), member 3	ENSMUSG00000021609	Down Regulated	7.33198	7.22233	7.10133	7.28891	7.57156	6.69458	6.86557	6.9268	6.99632	6.68406	6.99094	7.38961	6.89132	6.91544	7.00649	7.00952	6.80429	7.08673	7.20472	6.70228
14800.3	-2.32672	0.612041	-3.80157	0.000143783	0.0052221	Ace	11421	angiotensin I converting enzyme	ENSMUSG00000020681	Down Regulated	13.4009	13.8785	13.8691	15.2646	16.0035	12.2595	12.5581	12.8308	12.4799	12.516	13.2466	14.1898	12.3093	11.9829	12.4826	12.9853	12.8751	13.3678	15.5633	12.548
674.954	-2.46344	0.835272	-2.94927	0.00318529	0.0395592	Slc2a2	20526	solute carrier family 2 (facilitated glucose transporter), member 2	ENSMUSG00000027690	Down Regulated	9.80724	9.944	8.94	10.5643	11.6212	8.51064	8.32025	8.99998	8.85869	7.90035	9.14711	10.2518	7.98594	8.41334	8.73397	9.27826	8.0705	8.35166	11.7521	8.26791
10.5979	-2.47703	0.757639	-3.26941	0.00107773	0.0198037	Timd2	171284	T cell immunoglobulin and mucin domain containing 2	ENSMUSG00000040413	Down Regulated	6.94966	6.88756	6.99023	7.32658	7.16904	6.66364	6.74814	6.77307	6.82307	6.60205	7.1263	7.17303	6.83785	6.96199	6.78634	7.00165	6.47476	6.97557	7.31197	6.72491
11.9528	-2.50397	0.805045	-3.11035	0.00186865	0.0284656	Acsm5	272428	acyl-CoA synthetase medium-chain family member 5	ENSMUSG00000030972	Down Regulated	7.00942	7.26199	6.7365	7.15718	7.66463	6.76226	6.67441	6.84808	6.82928	6.81072	6.95286	7.24153	6.7565	6.62237	6.81076	6.93836	6.90273	6.7315	7.21769	6.69191
835.33	-2.50525	0.691586	-3.62247	0.000291805	0.00868054	Slc5a4b	64454	solute carrier family 5 (neutral amino acid transporters, system A), member 4b	ENSMUSG00000020226	Down Regulated	10.3117	10.4584	10.2374	10.8084	11.0062	8.72783	9.12083	7.77307	9.30621	6.89226	9.99425	10.6537	9.27312	8.99048	9.68867	10.0598	9.26355	9.72751	11.3342	9.25643
18.4731	-2.57556	0.751184	-3.42867	0.000606544	0.0137509	Cyp17a1	13074	cytochrome P450, family 17, subfamily a, polypeptide 1	ENSMUSG00000003555	Down Regulated	7.04425	7.23424	7.00469	7.41886	7.27453	6.68473	6.91766	6.60557	6.8165	6.76322	7.23939	7.84994	7.09217	6.77001	6.98659	7.1108	6.84058	7.44909	7.15544	6.62875
10748.8	-2.69885	0.926256	-2.91371	0.00357157	0.0428248	Enpp7	238011	ectonucleotide pyrophosphatase/phosphodiesterase 7	ENSMUSG00000046697	Down Regulated	13.0285	13.2644	13.4006	14.8327	15.372	10.8167	12.341	10.4937	12.865	8.29744	13.3669	14.0927	11.1096	10.9963	12.4297	13.165	11.2849	12.7552	15.3868	11.2459
33.537	-2.87307	0.943587	-3.04484	0.00232801	0.0324527	Pou2af2	69809	POU domain, class 2, associating factor 2	ENSMUSG00000036027	Down Regulated	7.06845	7.30648	7.23978	7.68421	8.0944	6.69859	6.83362	6.70599	7.21848	6.62587	7.50839	7.45137	6.83533	6.84389	7.22013	7.33489	7.08869	7.3554	8.29631	6.75281
241.767	-2.96303	0.678738	-4.3655	1.27e-05	0.000932258	Rnf208	68846	ring finger protein 208	ENSMUSG00000044628	Down Regulated	9.01119	9.31363	8.66112	9.64551	9.86766	7.39355	7.89244	7.41594	8.09348	7.18981	8.76432	9.42077	7.72746	7.47121	8.21922	8.41248	7.71665	8.33038	9.41841	7.54974
5804.56	-2.97905	0.573749	-5.19226	2.08e-07	5.01e-05	Pck1	18534	phosphoenolpyruvate carboxykinase 1, cytosolic	ENSMUSG00000027513	Down Regulated	13.174	13.2951	12.7956	13.7648	14.3362	11.2227	11.582	9.18687	10.9659	8.76073	11.9365	13.4323	12.2929	11.9521	11.8122	11.4591	11.4657	11.7716	13.2616	11.8123
16.7911	-2.99911	0.880718	-3.4053	0.000660903	0.0144246	Igf2os	111975	insulin-like growth factor 2, opposite strand	ENSMUSG00000086266	Down Regulated	6.94392	7.4966	6.91459	7.3629	7.60404	6.93458	6.62123	6.6334	6.77366	6.80164	7.22154	7.35518	6.83181	6.67021	6.88827	6.78144	6.75727	6.90414	7.70093	6.75018
777.158	-3.38473	0.852313	-3.97123	7.15e-05	0.00334605	Slc5a12	241612	solute carrier family 5 (sodium/glucose cotransporter), member 12	ENSMUSG00000041644	Down Regulated	8.34104	9.35405	8.44881	10.7311	12.147	8.68378	7.95517	8.02734	7.93009	7.78443	9.25277	10.0125	8.87779	8.34463	7.86105	9.20502	9.72037	8.73962	12.0714	9.89898
61.3962	-3.57593	1.00572	-3.55557	0.000377154	0.0103204	Otop2	237987	otopetrin 2	ENSMUSG00000050201	Down Regulated	8.14165	8.14738	7.92422	8.37318	8.28519	6.82158	7.17837	6.63512	7.30863	6.47476	7.40667	8.35906	6.8647	6.86951	7.64676	7.38978	6.76005	7.29187	7.96158	6.8994
19128.7	-3.83541	1.09073	-3.51638	0.000437476	0.011382	Apoa4	11808	apolipoprotein A-IV	ENSMUSG00000032080	Down Regulated	13.9478	14.6761	13.6	15.4571	16.5973	10.609	11.8601	10.7586	12.7185	9.90955	13.8536	15.7814	11.4177	11.8642	11.5102	11.8283	10.1232	12.0156	16.329	10.1238
538.332	-4.04172	1.12923	-3.57918	0.000344674	0.00972384	Slc34a3	142681	solute carrier family 34 (sodium phosphate), member 3	ENSMUSG00000006469	Down Regulated	9.36471	9.77824	8.95502	10.582	11.5354	7.41377	7.75522	7.2066	8.49637	6.74573	9.84419	10.0672	7.4145	7.22944	7.97167	8.45176	7.58365	8.46855	11.3468	7.3253
410.382	-4.91829	1.08505	-4.53276	5.82e-06	0.000564647	Slc23a1	20522	solute carrier family 23 (nucleobase transporters), member 1	ENSMUSG00000024354	Down Regulated	9.39357	9.87592	9.319	10.6033	11.2368	7.04229	7.41149	7.29473	7.83531	6.95777	8.98495	10.1238	7.19996	7.31728	7.5862	8.0335	6.97759	7.44887	10.2822	7.13275
